# Supplementary material for: UltraTimTrack: a Kalman-filter-based algorithm to track muscle fascicles in ultrasound image sequences
Source: PeerJ Comput Sci. 2025 Jan 24;11:e2636. doi: 10.7717/peerj-cs.2636 (PMC11784871; doi:10.7717/peerj-cs.2636)
Supplement: Article S1 — Summary of Kalman filter equations employed by the proposed UltraTimTrack algorithm. [file peerj-cs-11-2636-s008.docx]

# Supplemental Article S1

A Kalman filter considers the state (vector) of a dynamical system at time . It assumes that the current state (vector) depends on state-transition model , control-input model , the previous state (vector) , the current input , and the current process noise :

Eq. S1

Process noise is unknown, and assumed to be drawn from a zero-mean normal distribution with covariance . Because process noise is unknown, state cannot be computed directly. Instead, the Kalman filter can predict state , and update this prediction using a measurement to yield an optimal state estimate .

First, an *a-priori* state estimate is predicted based on the previous state estimate :

Eq. S2

Next, the *a-priori* state estimate is updated using a measurement to yield an optimal *a-posteriori* state estimate :

Eq. S3

Here, is the Kalman gain, and is a measurement that relates to state , through measurement model , and measurement noise :

Eq. S4

Measurement noise is unknown, and assumed to be drawn from a zero-mean normal distribution with covariance . Because measurement noise is unknown, determining the optimal value of Kalman gain is not trivial. To inform Kalman gain , the Kalman filter also predicts the state covariance . First, the *a-priori* state covariance estimate is predicted based on the previous state covariance :

Eq. S5

Next, the Kalman gain is computed as:

Eq. S6

The reader is referred to Kalman (1960) for derivation and details. Once the Kalman gain is known, the *a-posteriori* state estimate can be computed (Eq. S3), as well as its covariance :

Eq. S7

Here, is the identity matrix.

After Kalman filtering, *a-posteriori* state estimate can be smoothed using a Rauch-Tung-Striebel smoother. This smoother works in the backward direction: it computes the current smoothed state estimate from the next smoothed state estimate , and the next *a-priori* state estimate :

Eq. S8

Here, is the smoothing gain, which is computed from the next *a-priori* state covariance and the current *a-posteriori* state covariance :

Eq. S9

The reader is referred to Rauch et al. (1965) for derivation and details.

**References**

Kalman RE. 1960. A New Approach to Linear Filtering and Prediction Problems. *Journal of Basic Engineering* 82:35–45. DOI: 10.1115/1.3662552.

Rauch HE, Striebel CT, Tung F. 1965. Maximum likelihood estimates of linear dynamic systems. *American Institute of Aeronautics and Astronautics Journal* 3:1445-1450. DOI: 735 10.2514/3.3166.
