# Supplementary material for: UltraTimTrack: a Kalman-filter-based algorithm to track muscle fascicles in ultrasound image sequences
Source: PeerJ journal article supplement (doi:10.7717/peerj-cs.2636), 2025-01-24

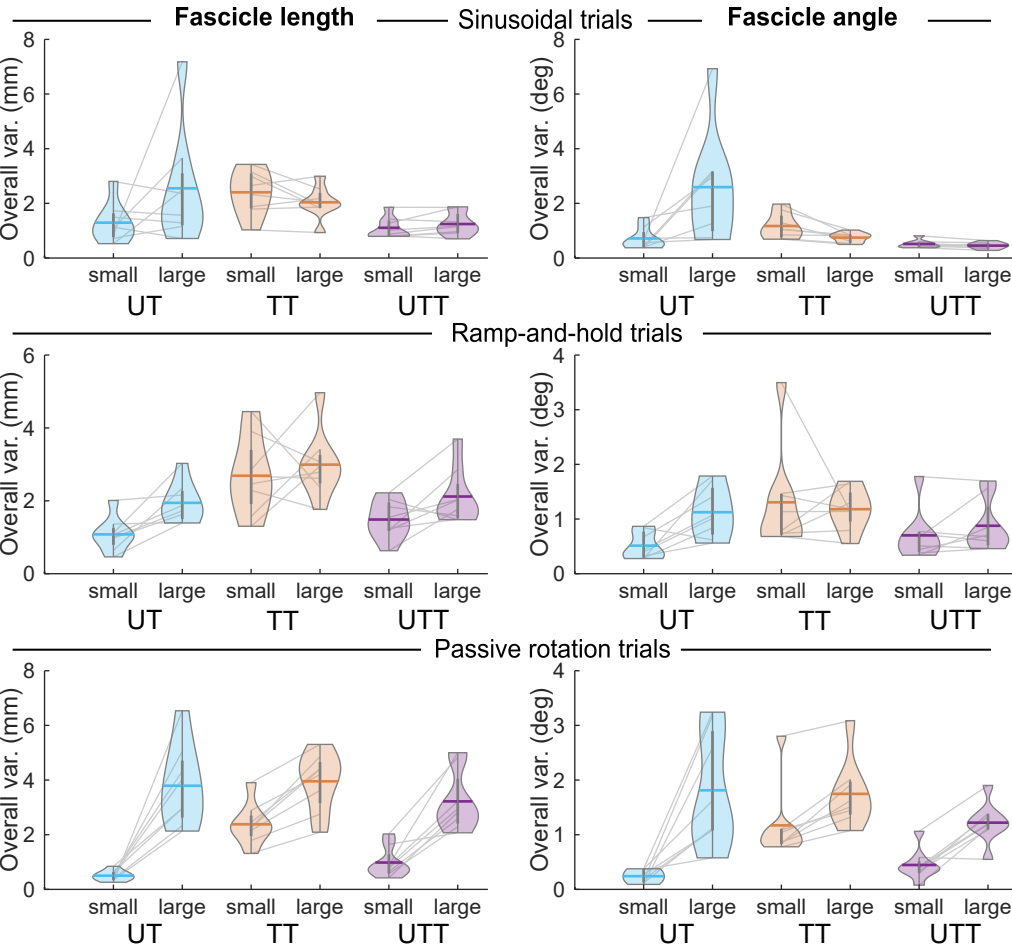

Supplement: FigS2.pdf [file FigS2.pdf]
