# Supplementary material for: UltraTimTrack: a Kalman-filter-based algorithm to track muscle fascicles in ultrasound image sequences
Source: PeerJ journal article supplement (doi:10.7717/peerj-cs.2636), 2025-01-24
Supplement: RUB_ultrasound_study-main.zip [file RUB_ultrasound_study-main.zip]

## Sheet: Fasc_length
	0	1	2	3	4	5	6	7	8	9	10	11	12	13
0	657.415	791.863	801.156	1210.35	804.536	594.947	594.434	762.892	748.456
1	657.412	824.319	800.636	1210.87	787.183	575.145	593.166	762.891	750.258
2	654.824	696.663	829.478	1210.33	787.179	535.107	599.022	761.138	751.041
3	652.545	777.583	829.738	1210.33	787.18	620.493	599.023	761.14	750.011
4	652.559	800.952	830.019	1210.61	787.462	620.527	599.051	761.686	749.78
5	652.615	799.406	828.981	1210.63	785.914	621.477	599.285	763.442	745.907
6	652.553	800.944	829.753	1210.6	785.122	644.52	599.041	761.419	746.421
7	650.028	800.954	830.021	1210.87	795.489	620.531	599.053	761.69	748.233
8	660.667	800.96	780.174	830.027	1210.87	810.003	620.539	599.059	761.698	748.24
9	651.036	800.948	780.165	830.015	1210.6	809.991	620.521	593.213	761.681	747.196
10	651.036	800.948	780.165	817.8	1210.6	804.289	620.521	596.51	761.681	747.196
11	653.821	800.948	817.8	1211.91	809.991	644.524	593.213	761.681	745.392
12	653.817	701.835	780.16	817.792	1211.9	802.728	644.514	593.205	761.414	745.384
13	653.78	802.361	780.173	820.279	1219.02	831.884	648.409	604.56	767.666	744.275
14	653.781	721.354	780.174	820.28	1220.85	833.443	616.255	601.007	767.666	744.79
15	653.778	721.346	780.17	819.755	1220.32	833.176	601.234	595.674	702.96	744.523
16	653.775	721.081	780.166	819.488	1218.75	928.339	588.773	595.666	702.947	744.001
17	651.923	695.94	778.556	817.575	1215.84	832.823	608.099	594.222	732.884	744.651
18	655.23	715.028	778.568	800.699	1212.72	919.928	593.459	668.304	747.997
19	646.11	695.959	734.84	792.41	1212.2	888.435	705.172	589.426	713.833	750.082
20	646.107	717.876	734.835	792.402	1184.64	871.263	743.048	589.672	732.895	751.62
21	648.614	662.048	777.218	782.378	1202.71	861.263	704.139	588.971	694.988	736.508
22	648.072	654.33	777.188	803.392	1203.21	863.341	651.008	595.05	695.276	735.742
23	653.134	657.672	777.188	817.421	1175.65	874.519	655.615	612.822	667.79	737.536
24	646.457	652.381	793.592	792.246	1220.26	878.57	712.849	599.447	704.897	738.861
25	651.69	724.352	834.6	789.333	1223.3	884.734	692.252	590.291	684.09	749.877
26	651.576	676.791	833.957	776.727	1216.91	900.986	714.151	599.979	682.048	746.871
27	663.682	675.335	777.607	773.735	1207.79	905.659	739.385	599.554	674.66	745.187
28	661.829	658.726	776.842	748.937	1219.12	908.397	748.839	600.657	684.048	749.603
29	658.926	665.425	776.456	726.502	1216.36	881.679	745.23	598.387	681.403	745.259
30	651.558	667.236	776.443	728.579	1216.36	887.416	714.856	599.928	705.852	746.31
31	672.837	676.262	776.426	737.912	1218.97	900.693	712.853	612.147	680.784	746.334
32	673.012	729.003	776.86	739.92	1222.79	902.427	694.299	613.375	687.93	747.824
33	653.755	742.427	776.877	761.36	1137.24	876.145	747.548	614.881	740.336	743.429
34	654.128	730.341	776.473	768.915	1110.07	878.054	780.382	614.146	737.231	742.959
35	684.703	696.48	776.855	739.101	1115.19	888.609	786.529	615.363	739.792	750.608
36	684.703	696.48	776.855	739.101	1115.19	888.609	786.529	615.363	739.792	750.608
37	656.343	767.357	792.782	1216.16	895.813	601.504	735.111	743.256
38	658.014	1086.6	823.305	1222.15	600.806	595.717	833.02	742.015
39	662.887	866.487	888.392	600.251	556.565	821.088
40
41
42	588.044	833.109	768.532	936.951	673.782	715.237	786.111
43	593.676	473.568	816.743	802.175	646.243	698.431	683.352
44	870.96	829.359	728.567	828.379
45	545.914	700.746	889.883	731.918
46	823.902
47	628.351	905.134	830.073
48	749.922	709.501	860.874	974.425	805.087
49	617.913	934.878	747.194	666.075
50	748.46	766.58	997.197	666.299	763.379	777.903
51	740.525	704.714	978.937	700.773	710.755	772.324
52	742.879	743.393	702.58	740.01	611.039
53	798.558	744.568	719.776	635.419	728.666	591.134	747.667
54	427.938	708.041	585.821	733.096	590.979	721.148	586.557	736.473
55	569.034	513.379	719.607	698.152	732.694	680.096	478.422	605.55	720.858
56	758.439	753.211
57	798.3
58
59
60	957.127	1255.71	485.661
61	920.723	652.613	506.239	840.679	893.062
62	751.513	585.129	637.849	709.66	585.934	817.749	872.351
63	646.507	719.096	730.818	873.735	977.35
64
65	607.889	942.135	685.467	1066.32	568.754	856.298
66	603.485	876.008	763.651	598.176	597.32	827.188	525.78
67	609.991	883.817	892.959	811.058	547.488	796.37	638.667	567.577
68	609.96	947.528	905.497	842.491	573.484	665.918	792.796	640.032	548.356
69	609.948	866.775	925.222	927.508	532.674	830.74	827.862	746.928	536.781
70	618.283	776.151	723.706	943.283	538.061	922.736	850.315	708.824	582.106
71	618.588	826.63	940.842	860.509	828.87	847.526	684.541	507.409
72	625.512	954.778	1054.48	866.359	737.403	848.965	686.023
73	631.322	1057.99	1038.43	683.01	697.466	862.267	621.054
74	631.822	915.749	1055.41	875.587	724.545	471.904	902.84	729.556
75	637.032	972.892	877.351	849.214	688.093	494.794	913.931
76	655.678	648.873	647.835	738.981	781.529	1071.47	1086.53	784.203
77	601.192	1000.33	823.471
78	592.394	865.373	881.408
79	566.871
80	809.851	532.812	817.776
81
82	519.485
83
84
85
86	675.035	739.076	782.982
87	553.469
88
89	613.267	756.587	722.54	695.727
90	884.695	595.296
91	729.246	694.843	594.31	870.69	691.651	554.029
92	968.133	732.521	801.463	782.654	562.321
93
94
95
96
97
98
99
100
101	867.474	750.217	667.598	772.44	937.923
102	606.184	893.036	769.202	659.571	758.017	436.529	846.44
103	604.946	917.575	795.922	712.787	1027.45	782.954
104	605.692	639.144	836.012	685.579	718.31	823.948
105	605.156	876.488	798.248	839.706	904.564	573.615	813.265	722.259
106	607.912	639.57	678.888	679.305	1057.69	787.569	803.195
107	609.675	876.46	678.889	656.459	1039.39	778.256
108	618.933	736.222	676.206	1063.92	789.54
109	618.954	920.998	763.378	676.2	926.464	797.293
110	618.462	849.471	793.968	908.065	1052.27	812.817
111	619.037	877.241	860.07	878.562	1010.61	831.577	636.779
112	613.285	877.553	819.055	833.924	807.802	641.959	857.821
113	615.365	877.892	820.199	858.437	849.63	630.151	859.238
114	616.852	722.806	799.936	835.55	867.501	634.473	856.875
115	619.968	722.751	800.351	833.926	818.39	566.534	699.365
116	619.997	739.284	834.499	833.995	553.261	699.7
117	620.95	677.668	830.935	817.464	548.789
118	623.376	649.151	960.792	581.743	793.879	562.523
119	632.702	754.961	851.406	981.784	999.854	794.127	650.437
120	621.428	787.626	706.214	882.842	592.716	869.348	595.178	834.996
121	619.688	869.808	753.076	838.766	840.397	812.928	736.882	591.58
122	667.406	877.993	604.798	740.844	622.103	652.552
123	588.511
124	837.803	828.482	811.646
125	1214.19	902.341	767.753	843.869
126	571.095	852.825	822.044	657.664	805.829	734.127	704.994
127	796.714	536.211	781.353
128	560.695	713.145	667.091	792.928	1057.89	643.304	806.134	684.289	734.914
129	561.364	796.118	669.126	1011.65	642.218	810.56	677.893	1029.43	884.905
130	553.908	586.122	785.543	1196.32	570.458	805.471	692.011	1324.84
131	893.061	780.91	697.692	746.977	608.568	801.813
132	551.943	716.2	588.15	779.852	927.604	826.054	744.463
133	552.007	711.326	586.844	779.896	921.88	817.783	739.321
134	768.809	718.703	691.277	793.659	844.286
135	765.828	740.17	805.751	893.033	742.018	831.691
136	735.52	785.457	671.688	891.528	856.017
137	756.827	675.451	942.008	615.077	632.268	439.649
138	716.813	723.622	1024.94	748.537	695.474	746.127
139	565.291	635.683	815.431	577.672	522.934
140	644.63	742.748	654.163	688.279	751.78
141	734.109	685.24	642.922	683.696	736.42
142	742.712	734.475	665.675	581.29	738.205
143	472.003	924.912
144	771.72	724.826	747.301	637.204	715.949
145	771.457	724.823	747.037	637.686	716.199
146	678.033	685.989	720.753	694.961	606.62	410.539	613.575	711.369
147	710.626	723.684	987.624	702.529	581.3	418.123	583.792	715.747
148	731.621	1034.13	725.193	723.13	581.132	426.484	622.141	716.174
149	727.162	832.947	724.718	687.452	384.968	555.916	713.989
150	760.857	731.803	778.497	631.302	395.023	529.148	734.279
151	468.613	403.743	738.741	748.457	632.025	682.352	723.27
152	799.815	809.374	517.178	576.058	696.188	741.544	777.488	621.72	727.457
153	515.531	491.906	567.229	534.776	624.804	676.716	792.32	742.158	721.312
154	516.845	540.097	915.926	578.547	768.939	716.703	735.111
155	665.687	678.366	640.44	687.892
156	757.36	800.189
157	755.212	798.035
158	669.989	739.265	806.871
159	839.543
160	592.295	737.185
161
162
163
164	551.635	627.477	1040.57	484.062	1279.22
165	596.604	1025.88	736.15	677.891	880.987	746.08	769.78	441.631	794.605
166	660.435	676.485	629.766	810.933	805.339	797.768	751.733	760.575
167	650.575	783.941	621.755	677.234	892.085	751.493	721.174	753.246
168	820.939	617.132	736.396	872.971	736.681	752.763	752.36
169	794.215	622.945	750.884	954.591	717.116	733.946	383.448	749.54
170	658.895	626.51	826.478	721.806	709.292	497.175	743.414
171	893.246	627.552	771.213	729.778	505.353	660.927	423.511	739.777
172	875.424	620.393	773.059	723.368	552.622	655.108	431.41	799.956
173	659.312	876.684	624.922	768.356	684.74	552.03	674.276	466.169	788.006
174	649.525	625.006	754.31	732.521	553.085	658.08	421.433	789.732
175	648.454	631.261	837.46	734.759	552.7	751.852	364.362	799.225
176	662.667	627.755	830.389	750.944	554.128	748.668	782.859
177	645.369	622.38	866.187	697.724	735.37	553.173	796.963
178	646.16	624.432	812.286	852.36	548.96	813.951
179	654.979	627.675	1002.35	844.183	934.287	566.319	813.591
180	620.276	556.66	748.234	624.122	853.134
181	623.978	560.377	743.34	592.787	851.585
182	623.853	777.653	591.991	875.161
183	616.546	477.542	831.167	799.529	543.86
184	611.439	525.31	871.36	667.256	802.799	499.737
185	617.21	750.946	766.437	784.236	628.67	747.591
186	603.258	806.981	752.812	840.462	751.825
187	589.13	785.525
188	776.542
189	525.409	818.928	839.584	685.299	946.359
190	786.111	654.144	782.774	767.599
191	466.986	795.303
192	822.085	795.32	849.729
193	549.026	787.424	1017.13	800.496	825.454
194	802.955	789.763	822.677	664.488	834.787
195	757.572	724.851	917.865	760.915	833.993
196	749.167	725.005	937.545	700.916	828.768	1244.88
197	571.053	885.786	476.438
198	671.981	913.377
199
200
201	1223.52	1224.43	1240.87
202	407.233
203	1371.61	1226.52	1138.08	921.727	1196.69
204	459.096	465.223
205	749.974	682.619	556.766	541.858	723.141	701.345	764.758	808.19
206	747.651	679.725	597.246	610.006	706.857	826.425	798.234
207	679.327	716.092	717.37	622.177	709.921	878.034
208	681.454	724.952	635.555	622.056	523.634	716.076	824.045	886.268
209	679.771	721.652	602.328	537.742	713.935	830.577
210	817.926	895.09	655.236	378.56	648.711	874.364
211	632.042	455.479
212	497.866	863.158	623.459	732.884	849.605	567.072
213	551.727
214	659.604	703.252
215	782.512
216
217
218	897.957
219
220	1005.83	880.061
221	660.458	800.261
222
223
224
225
226	508.282
227
228	734.906	617.676	708.767	689.982	656.395	777.984	771.069
229	884.256	623.359	864.748	774.218	692.768	827.787	764.832
230	877.671	613.527	1029.12	816.952	758.471	805.137	764.853
231	875.981	623.358	886.586	811.321	760.62	514.609	860.958	763.939
232	645.452	619.396	974.71	806.631	748.224	591.195	842.772	750.496	566.282
233	648.485	676.561	614.11	1024.19	817.517	1084.22	647.766	743.239
234	648.021	640.923	618.466	996.018	817.516	832.347	657.422	745.475	847.111
235	686.785	620.643	1044.08	871.934	791.263	661.382	751.54	548.606
236	700.337	619.326	967.854	876.509	754.668	655.562	753.475	588.24
237	605.026	624.577	974.532	792.815	725.839	671.278	755.129	802.383
238	623.82	992.821	817.412	653.218	777.555
239	625.039	973.698	869.303	559.108	652.547	777.481
240	621.18	962.872	848.367	691.686	1117.83	825.988
241	625.831	967.927	869.565	772.006	1109.87	840.962
242	626.372	946.756	843.565	1099.48	771.701	825.13
243	626.374	1014.48	885.164	600.379	775.597	897.019	581.584
244	626.978	1050.58	840.316	572.547	748.315	900.252	672.567
245	489.507	636.631	850.561	1050.57	941.733	898.135	849.612	867.494	647.885
246	933.514	623.763	1049.48	742.708	500.755	767.88
247	1016.19
248	779.855	791.37
249	513.578
250	891.213	676.201	850.938
251	801.494	546.835	818.807
252	787.351	689.084	556.836	812.85
253	760.711	721.128	750.668	882.112
254	760.711	721.128	750.668	882.112
255	759.063	724.257	909.953	631.107	813.798	540.554
256	734.014	840.824	760.662	955.018	673.003	783.467
257	662.808	887.695	356.768
258	641.107	750.232	580.966	632.119
259	795.593
260
261	492.984
262
263	368.224
264	719.45	465.783
265	806.469	1015.68	537.348
266	681.703	680.156	606.491	524.321	696.669	820.603
267	703.735	687.162	940.199	506.723	700.494	786.09	809.735
268	793.112	1035.78	943.999	701.667
269	558.571
270	876.74	884.277	698.261	616.512	649.042	742.744	572.253	656.986	707.657
271	502.139	601.414	870.367	709.018	657.241	635.525	662.321	595.167	704.381
272	541.897	433.325	721.135	658.42	693.337	636.761	674.585
273	529.036	764.568	713.243	414.237	724.116	660.633	615.137	746.655	658.214	718.714
274	533.248	732.18	674.499	452.698	675.742	375.362	744.246	727.662
275	719.793	731.839	627.265	746.235	640.207
276	748.028	770.449
277
278
279	738.779
280
281
282
283
284	677.533	825.764	763.498	798.548	784.259	567.524
285	603.213	734.991	734.793	913.912	629.951	597.622	623.084
286	876.639	607.183	651.796	899.611	678.874	807.702
287	654.201	609.475	830.192	998.693	686.24	677.201	625.899	800.036
288	654.984	899.523	605.956	957.127	692.363	750.969	621.013	811.076	744.172
289	652.279	608.289	1046.2	727.341	772.587	677.196	807.618	741.843
290	653.315	811.575	616.674	915.038	981.399	745.167	763.413	797.105	834.908	713.914
291	670.051	865.399	613.906	855.716	753.883	688.482	849.185
292	652.297	413.143	624.237	846.594	786.698	768.636	819.626
293	660.719	685.939	622.533	806.556	995.157	858.11	782.376	791.993	514.588	1144.13
294	705.204	778.465	618.021	904.209	1057.12	711.919	773.119	516.117	911.119
295	622.817	904.217	1058.43	617.369	729.141	536.423	929.866
296	618.768	904.206	1058.68	673.9	539.342	529.639	1009.92
297	617.266	839.058	1049.8	489.189	1011.47
298	622.82	834.694	1056.87	848.272	505.892	610.698	482.247	910.342	901.978
299	616.984	778.477	1056.85	552.61	640.857	446.943	480.538	980.229	969.286
300	615.504	802.344	996.162	650.913	1027.15	468.167	892.413	665.52
301	614.496	802.345	989.627	650.916	1094	479.302	907.499	665.523
302	614.499	802.349	951.478	627.87	480.801	846.467	665.787
303	614.5	778.513	965.325	659.133	480.803	773.221	665.789
304	608.698	778.501	947.285	673.494	500.172	772.946	665.508
305	608.681	739.355	964.245	669.529	573.02	482.73	789.451	410.752	611.49
306	592.577	938.063	992.372	751.251	744.923
307	778.498	528.782
308	816.431	761.476	1056.67
309	648.356	628.28
310	741.918	750.209	857.571
311
312	771.647	605.839	561.82
313
314	618.221	703.434	611.841
315	618.256	703.72	557.95
316	903.937
317
318
319
320	1277.7	1017.03	1379.49	1318.62
321	651.269	820.813	480.916	699.107
322	682.155	564.174	674.888	833.211	622.353	686.762	765.301	845.357
323	736.531	710.126	669.567	591.475	711.232	847.713
324	461.925	711.407	673.302	613.213	709.033	830.563	859.207
325	406.63	332.225	711.189	670.164	639.009	680.961	702.694	803.146	913.552
326	531.266	748.542	1059.31	714.033	674.463	635.339	713.939	787.841	897.092
327	569.597	757.255	709.726	687.662	670.97	639.5	673.325	702.527	802.927	906.9
328	632.176	813.329	744.946	679.339	649.866	632.132	524.632	823.135	699.069
329	674.093	786.345	676.075	735.708	653.969	648.198	807.89	616.155	833.441	688.118
330	565.658	732.894	686.471	816.265	605.702	724.225	685.892	500.316	845.901	683.608
331	692.456	737.216	857.636	584.387	651.873	992.891	372.57	714.829	692.221
332	694.631	705.36	799.142	610.117	759.443	636.844	432.268	838.705	696.672
333	732.123	708.509	724.485	816.532
334	693.197	690.63	645.363	670.776	710.919	429.467	740.375	695.362
335	461.741	969.492	682.231	782.193	765.398	1251.97	780.422	861.215
336	544.216	798.309	469.825	941.27	917.698	974.581	1070.34	863.793
337	757.281	1034.31	1249.17	795.248	859.187
338	833.712
339	1404.06	1238.97	962.567	1223.72
340	800.587	693.95
341
342
343	866.438	870.947	806.332
344	676.26	795.846
345	700.956	818.516
346	800.997
347	789.875
348	638.756	977.578
349	561.641	556.407	746.125
350
351
352
353
354
355	664.326	624.64	736.466	794.563	563.239	835.832	672.956	578.353	992.735
356	661.923	626.46	593.527	957.865	559.032	773.237	713.248	617.437	862.37
357	650.869	480.675	522.715	785.823	497.615	698.664	1083.97	411.647	777.7	507.347
358	647.937	485.294	602.015	830.159	756.096	711.086	1164.24	610.552	813.932	677.09
359	647.578	603.675	721.756	665.698	730.25	1132.12	836.074	619.851
360	703.321	604.046	716.823	1078.09	798.151	641.17	778.098	776.321	589.249	552.656
361	606.524	739.486	1068.69	758.911	648.258	746.776	780.122	623.378	552.038
362	604.239	736.393	1063.19	730.777	645.902	736.139	786.781	673.778	488.08
363	658.803	602.738	736.401	1061.38	608.744	694.119	632.441	740.02	787.309	673.788	551.955
364	659.067	601.742	778.352	1058.53	550.347	709.048	539.409	733.333	776.997	673.808	551.976
365	659.042	372.123	603.982	778.326	1061.63	708.494	752.648	779.288	673.502	576.829
366	656.96	390.342	608.713	786.972	1048.75	710.487	434.33	514.313	777.416	588.236	612.963
367	660.152	429.824	603.814	787.156	1053.94	609.148	455.094	456.595	660.221	550.595	671.932
368	613.339	787.319	1023.95	699.512	619.892	597.352	763.552	670.313
369	871.197	616.762	712.58	1017.81	703.708	675.788	999.359	654.936	539.829	614.547
370	816.683	631.05	715.246	1019.96	674.775	920.662	684.887	379.523	736.41
371	671.175	856.109	635.744	1007.05	715.296	620.224	569.6	794.898
372	670.627	803.706	627.92	1036.62	622.578	606.249	1098.41	762.771
373	669.414	679.731	608.344	362.416	604.576	757.915
374
375	774.603	727.975
376	824.182	726.587
377	707.215	521.412	331.565	708.136
378	597.2	934.411	649.174	552.413	742.669	775.416	678.86
379	598.04	533.306	1089.57	602.811	581.287	630.6	658.518	691.832	655.988
380	588.213	909.817	830.036	788.634	815.143	691.974	682.376
381	588.537	879.96	827.4	807.778	822.217	714.621
382	585.245	1063.01	828.61	860.784	737.5	814.581	724.681
383	619.643	842.754	935.154	691.529	960.593
384	757.39	416.505	819.176	948.148	707.504	915.45	821.986	1289.17
385
386	770.307	832.31	671.617	885.829
387	762.993
388	963.061
389	541.133	585.392	854.838	703.984	600.538	770.288	684.439	794.754	1165.12	733.095	1013.74
390	530.509	818.632	627.994	768.867	630.902	704.484	806.163	1119.83	729.907
391	554.608	975.62	654.022	768.06	653.566	696.925	795.499	981.797	732.905	835.606
392	708.4	544.026	650.072	768.405	665.802	707.617	677.853	974.611	1109.12	734.547
393	521.393	764.663	931.659	670.643	770.425	624.103	687.777	788.19	716.377	736.926
394	511.955	783.499	754.368	861.119	720.233	770.627	642.225	777.658	742.614
395	517.092	801.888	773.644	768.376	622.362	776.379	757.049
396	517.356	801.939	773.963	769.435	622.431	760.447
397	515.181	943.969	731.996	768.524	629.538	760.116
398	515.442	1050.91	744.912	770.042	602.281	759.019
399	514.246	753.098	766.48	551.046	762.1
400	752.527	908.979	642.588	630.783	636.597	1099.61	598.634
401	1095.39	1205.09	996.751	1070.09
402	568.429	588.124	744.535	739.239
403	441.746	797.948
404	562.475	477.785	737.962	692.264	719.033
405	365.303	752.489	746.859
406	687.121	818.261	915.879	750.423	650.341	752.081
407
408	681.917	856.88	768.966
409	842.766	820.461
410	665.405	748.732	915.042
411	628.109	937.62
412	670.157	986.99
413	557.686	751.237
414	856.656
415
416	622.576	577.273	658.027
417	831.413	631.037	653.754	914.72
418	870.465	612.704	635.698	614.508	803.475	919.033	530.802	548.685
419	683.055	466.115	818.051	919.72	1027.44	574.75	726.094	563.392	655.669	448.665
420	637.47	756.341	496.251	814.385	962.547	797.681	684.898	664.329
421	753.36	564.998	717.102	778.891	982.57	994.207	674.984	803.099
422	761.62	640.603	678.153	624.874	565.958	559.939	937.984	472.542	571.206	687.977	1093.99	760.821
423	655.74	633.94	688.481	632.013	688.067	673.372	542.367	455.732	581.689	966.445
424	658.244	931.978	634.162	685.891	551.219	643.626	624.404	722.074	520.471	916.581
425	652.816	636.327	555.589	585.501	474.838	539.484	943.457
426	641.008	647.441	493.159	747.799	439.751	636.048	916.893
427	635.428	665.719	837.952	935.16	452.651	921.869
428	630.639	886.921	798.539	460.722	851.203	682.75	450.399	761.507	940.88
429	625.084	612.066	850.183	807.928	681.992	518.474	809.09
430	629.866	612.02	905.294	798.054	627.787	673.738	1274.46	434.592	784.504
431	892.512	613.421	736.873	796.939	786.324	680.045	430.362	800.946
432	892.109	613.612	651.873	761.791	669.956	484.867	803.266
433	673.917	633.345	859.133	640.503	888.407	774.87	458.314	811.649
434	639.437	627.538	732.661	688.942	575.196	990.758	786.933
435	654.668	645.027	585.528	689.001	922.425	787.848	562.316	1120.66	799.916
436	781.535	605.295	618.406	529.27	924.311	824.996	569.02	770.028
437	771.363	607.105	608.617	545.276	571.178	753.465
438	820.067	597.73	644.2	649.774	761.737	911.548
439	734.292	755.263	793.533
440	591.401	853.905	773.859
441	531.06	812.409	756.884	718.865	816.177	888.28
442
443
444	478.939
445
446	524.092
447	650.236
448	581.916	794.179	774.881	1049.69	852.892	677.559	988.41
449	576.709	778.822	847.974	689.461	645.491	851.609
450	668.65
451	796.881
452	640.668	604.086	759.447	742.768
453	629.521	831.297	861.029
454	689.011	663.836	751.528	743.137
455	880.366	642.099	1227.79	814.385
456	852.296	615.214	1177.89	776.415
457	721.279	516.364	629.066	726.507
458	515.585	622.647	721.247	603.995	298.339	695.538
459	655.309	815.283	687.107	721.132	934.83	684.864	725.768
460	664.947	954.15	694.491	721.107	961.983	685.848	733.431
461	440.966	525.745	916.693	749.815	721.982	834.367	592.695	736.488	370.743	709.355
462	556.229	461.699	750.758	627.021	718.025	636.712	985.153	691.743	371.057	713.732
463	524.991	644.434	831.862	619.803	718.125	622.229	883.739	763.309	758.01	369.507	710.054
464	525.006	564.326	725.371	718.146	614.191	845.458	751.025	519.674	369.539	708.291
465	532.623	564.712	709.847	719.013	628.578	894.561	752.774	520.379	390.502	708.952
466	532.62	564.711	696.26	718.497	622.764	894.563	767.677	520.38	415.866	708.696
467	533.281	563.772	710.423	717.672	590.292	850.638	686.544	467.689	345.279	706.603
468	528.456	426.289	706.482	584.57	722.706	639.582	665.395	533.671	708.676
469	993.951	843.815	983.764	752.129
470
471
472
473
474
475
476	520.242	613.139	694.69	764.688	800.533	586.323
477	490.698	525.186	719.512
478	558.792	513.879	576.209	803.685	720.492	764.732	820.979	446.14	641.656
479	520.542	746.471	796.296	834.507	609.941	654.107
480	525.942	561.241	783.109	819.257	399.037	669.289
481
482	543.753	657.999	881.916	806.504	733.39
483
484
485
486
487
488	609.841	473.203	723.29	776.506	651.308	637.678	761.592	682.447
489	644.149	645.159	497.993	830.054	710.32	1026.19	654.446	538.837	1182.79	646.352
490	833.768	348.66	588.941	733.768	644.209	830.418	780.875	488.878	606.424	812.384
491	742.772	543.262	582.661	769.135	851.744	626.932	756.578	434.18	678.075	797.086
492	905.244	726.158	574.124	591.538	474.297	726.379	639.243	410.924	602.666	775.593
493	734.232	470.863	607.227	656.357	643.712	271.001	485.58	520.151	752.926
494	725.127	616.632	616.534	645.944	282.995	530.58	752.61
495	646.871	886.388	720.7	646.511	657.333	586.268	272.337	513.163	478.485	757.993
496	646.871	886.388	720.7	646.511	657.333	586.268	272.337	513.163	478.485	757.993
497	624.71	888.905	735.566	644.06	688.639	581.656	512.241	1160.3	505.321	503.52	759.388
498	631.018	716.432	768.513	606.838	752.069	585.04	512.819	496.232	502.528	760.004
499	633.004	759.567	702.909	726.214	603.03	548.706	515.407	519.94	763.552
500	641.307	785.417	705.309	804.411	675.167	604.4	451.493	516.287	495.792	751.247
501	627.886	801.255	700.888	661.974	662.089	570.165	613.472	517.199	504.678	782.446
502	516.869	889.822	988.012
503	612.468	789.343
504	709.726	708.991
505
506	640.993	598.902	655.174	768.355	612.016	871.098
507	601.18	567.371	590.501
508
509
510
511	604.545
512	604.545
513
514	621.088	770.112	764.536	701.632
515	780.549	770.97	787.241	670.908	1031.4
516	590.889	908.756	681.969	763.787	780.539	745.346	702.139	804.357
517	526.399	781.043	713.9	763.837	654.207	749.182	718.046	713.677	809.367
518	522.878	761.863	627.192	759.403	634.826	951.307	714.454
519	510.962	493.617	672.547	756.673	879.113	713.553
520	818.184	1057.78	914.537	1049.7	653.325
521
522	844.039	831.859
523	593.51	925.208	874.975	930.856
524	540.513	539.554	665.638	726.826	720.012
525	683.355	741.675	600.006	759.583
526	537.759	581.789	727.477	728.827	715.353
527	527.9	748.527	739.167	728.076	718.35
528	547.041	617.949	862.698	731.213	729.508	606.877	710.903
529	523.797	539.948	926.521	655.11	728.801	709.268
530	637.379	520.659	810.059	660.583	729.861	707.592
531	520.654	921.531	729.083	646.082	709.124
532	520.398	897.898	729.858	718.088	649.834	714.522
533	806.448	520.392	810.819	729.848	701.186	714.764
534	644.302	528.86	729.456	671.134	717.322
535	746.158	525.931	731.041	574.887	654.137	642.156	720.925
536	563.108	608.608	527.464	643.778	734.487	697.024
537	527.606	744.021	740.075
538
539	1204.48
540
541	625.872	988.302
542	584.902	1033.38
543	886.119
544	862.292
545
546	550.345	450.513	777.368	803.466	729.037
547	552.284	576.27	690.57	800.23	815.724	767.724
548	949.756	761.425
549	842.142
550
551
552
553
554	635.8	775.567	657.329	633.105	521.942	527.29	644.829	539.261	873.245	775.688
555	851.922	634.499	672.747	904.579	580.104	541.024	668.89	796.495	699.949	1082.94	582.273	737.673	848.148	516.011
556	892.26	625.358	679.837	692.392	398.6	613.819	790.93	863.227	719.184
557	893.045	622.841	684.422	692.41	395.745	650.329	760.962	801.604	745.197
558	900.031	623.364	694.617	696.305	421.458	571.24	740.351	894.952	745.49
559	904.939	634.486	681.394	637.547	477.57	572.517	665.561	795.442	657.458
560	915.288	630.717	673.466	535.155	592.327	652.034	456.858	789.533	648.561
561	892.821	630.688	674.496	1150.92	512.093	593.091	535.795	796.516	648.581
562	631.973	674.546	981.047	556.687	560.252	535.591	698.283	858.954
563	630.698	675.312	712.256	536.327	491.204	663.196	868.031
564	625.654	629.058	675.066	712.522	536.34	523.094	1138.73	895.31	663.205
565	630.898	899.678	714.935	871.503	727.023	562.705	522.53	623.007	856.139
566	631.612	895.539	729.151	513.292	523.372	556.55	871.741
567	611.467	562.366	658.923	802.493	796.282	398.244	564.773	834.616	697.422
568	804.665	453.135	712.041	762.527
569	681.928	757.435
570	732.192	727.889	668.051	760.439
571	581.89	733.156
572	1029.32	614.985	752.813	768.545
573	666.058	721.735	523.502	533.628
574	665.579	712.546	515.607
575	851.278
576
577
578	806.553	1185.2	1159.4
579	624.826	566.511	435.174
580	990.143	774.639
581	469.48	510.189
582	513.529	763.514	590.118	583.406	722.262
583	635.155	758.696	580.89	539.441	683.699
584	477.169	712.891	554.424	581.095	665.457	753.372	543.642	725.25	729.784
585	477.169	712.891	554.424	581.095	665.457	753.372	543.642	725.25	729.784
586	612.004	564.469	371.328	654.569	753.862	737.131
587	646.632	831.582	570.988	749.117	723.952
588	541.156	810.743	558.486	743.575	616.262	684.18
589	553.597	747.947	678.245	743.769
590	700.241	746.633	682.187	988.052	758.192
591	596.635	576.332
592	567.016	531.938	928.905	638.349	732.116	723.529
593	534.499	918.348	787.928	613.019	727.685	614.144	711.177
594	527.395	647.254	723.421	595.196	611.743	640.216	649.229
595	523.361	835.691	726.53	628.473	625.586	418.214	698.629	708.922
596	524.107	826.873	726.779	618.544	669.915	401.337	701.652	708.138
597	526.669	794.418	728.348	640.229	745.916	479.151	718.94
598	542.837	735.28	728.365	655.456	731.353	495.032	626.557	715.019
599	523.206	683.332	729.058	669.232	387.688	718.473	665.217

## Sheet: Pennation
	0	1	2	3	4	5	6	7	8	9	10	11	12	13
0	17.1087	15.7056	15.0006	13.8705	15.5168	18.3688	18.7899	16.5858	16.0311
1	17.1125	15.3144	15.0095	13.8662	15.7612	18.9452	18.8275	16.585	16.0009
2	17.2569	16.1215	14.6811	13.9185	15.7866	20.224	18.6652	16.5887	15.9992
3	17.3192	15.9095	14.6796	13.9204	15.7879	18.6615	18.6661	16.5887	16.0184
4	17.3213	15.6203	14.6785	13.9232	15.788	18.6658	18.6681	16.5843	16.0275
5	17.2514	15.6197	14.679	13.8836	15.7904	18.666	18.6654	16.5822	16.0888
6	17.3227	15.6201	14.6828	13.9227	15.8194	18.0725	18.6675	16.5873	16.0854
7	17.3888	15.621	14.6791	13.9216	15.6767	18.6657	18.6681	16.5845	16.053
8	17.1113	15.6205	14.4203	14.6791	13.9216	15.4807	18.6667	18.6676	16.5868	16.0529
9	17.3597	15.6192	14.42	14.6774	13.9222	15.4794	18.6644	18.8287	16.5828	16.0698
10	17.3597	15.6192	14.42	14.8172	13.9222	15.5546	18.6644	18.7372	16.5828	16.0698
11	17.2873	15.6192	14.8172	13.9066	15.4794	18.0729	18.8287	16.5828	16.101
12	17.2876	16.0376	14.4202	14.8164	13.9052	15.5757	18.0717	18.8285	16.5863	16.1004
13	17.2898	14.6201	14.4202	14.8159	12.9028	15.2215	17.042	18.534	15.5829	16.1524
14	17.2894	15.7408	14.4202	14.8162	12.8819	15.2041	17.8311	17.629	15.5833	16.1434
15	17.2855	15.7388	14.4167	14.8215	12.884	15.2041	18.2309	17.774	16.7962	16.1449
16	17.2812	15.7409	14.4132	14.8221	12.8985	14.1883	18.5729	17.7726	16.7944	16.1523
17	17.2281	16.1205	14.3485	14.8041	12.8521	15.1461	18.0137	18.7751	16.1898	16.0972
18	17.0916	15.7807	14.305	14.9915	12.8604	14.1556	18.7784	17.524	16.0157
19	17.377	16.1204	15.2549	15.1156	12.8959	14.5033	16.8112	17.9099	16.5591	16.0042
20	17.3781	15.7549	15.2561	15.1155	13.017	14.6885	16.1217	17.9042	16.1925	15.977
21	17.3864	16.7259	15.4387	15.2297	13.9704	14.8182	16.7536	18.9076	16.8028	16.2335
22	17.5163	16.9091	15.5377	15.0099	14.0282	14.8701	17.8863	18.7769	16.7999	16.3022
23	17.3725	16.8411	15.5285	14.8399	13.1478	14.7404	17.7782	18.292	17.3958	16.2585
24	17.5324	16.9905	15.1999	15.2055	12.9767	14.7391	16.7161	17.6797	16.7958	15.2918
25	17.3758	15.7393	14.4235	15.2682	12.9726	13.685	16.1643	17.9656	16.3154	15.1251
26	17.3749	16.5338	14.4255	15.4159	13.0091	14.5113	16.7143	17.6799	17.3092	16.1595
27	17.0816	16.5322	14.5078	15.4117	12.9922	14.4339	16.174	18.6775	17.3146	16.1493
28	17.0972	16.8922	14.5052	15.8197	13.0071	14.4372	16.1186	17.6744	16.3132	15.1259
29	17.0557	16.7063	14.4078	16.1097	12.9306	14.6126	16.1219	17.6745	17.3132	16.1265
30	17.3591	16.7076	14.5056	16.1078	12.9972	14.6314	16.6882	17.6754	16.7978	16.1608
31	16.8503	16.5316	14.5374	15.9578	12.9928	14.5176	16.7114	17.3414	17.3108	16.1582
32	16.8114	15.6621	14.5025	15.9574	12.9691	14.4928	16.1193	17.3365	16.2372	15.158
33	17.179	15.4093	14.397	15.6012	13.2535	13.6819	16.121	17.2509	16.1914	15.1828
34	17.167	15.5743	14.3982	15.4715	13.3601	14.647	15.5584	17.2512	16.1922	16.1664
35	16.4345	16.1546	14.4217	15.9385	13.3689	14.5698	15.5014	17.2486	16.1964	15.0625
36	16.4345	16.1546	14.4217	15.9385	13.3689	14.5698	15.5014	17.2486	16.1964	15.0625
37	17.2967	15.1108	15.212	12.9748	14.5629	17.6714	16.1913	16.2331
38	17.1954	13.5617	14.3287	12.919	18.5168	17.8133	14.6696	16.2447
39	17.0489	14.6326	15.2413	18.693	20.1472	15.6666
40
41
42	17.9699	13.3712	14.1383	12.19	15.9055	15.1431	13.9548
43	17.6574	21.3772	13.5544	13.6047	16.4509	15.3998	15.8438
44	12.2565	12.057	13.5637	11.5549
45	19.6527	14.7576	12.0994	14.3013
46	13.6596
47	16.2917	11.9907	12.8295
48	14.8026	14.3982	12.8281	11.1679	12.8388
49	17.7523	14.2791	16.1997	17.6156
50	14.6786	13.3417	11.7984	15.2807	13.2376	12.9771
51	14.8194	14.2903	11.0773	13.7273	13.2774	13.0927
52	14.6535	14.6428	15.2498	14.4285	16.3058
53	13.957	15.0251	15.3219	16.547	15.366	16.7525	14.6436
54	23.2119	14.5526	16.912	15.2661	16.7962	14.7948	17.2411	14.8882
55	18.8248	21.7851	16.1944	16.2765	15.2307	16.1677	21.2048	17.3552	15.9142
56	14.403	13.4915
57	16.0372
58
59
60	12.4814	11.3617	22.2199
61	16.3035	19.4725	23.2602	16.8626	16.7293
62	16.6819	18.1261	19.2025	17.3333	19.6822	16.6708	15.5312
63	17.933	15.1775	14.9177	14.3534	13.8119
64
65	18.8731	14.2753	17.166	13.2443	19.0008	15.1468
66	19.395	15.0996	15.9184	18.7736	18.0228	14.7101	20.3965
67	19.2782	15.0305	14.9579	15.2672	20.2429	15.1561	18.2838	19.8339
68	19.4993	14.6193	14.9564	14.9965	19.4479	17.4582	15.3133	17.2843	19.5303
69	19.3053	15.1938	14.6812	14.0153	20.7106	14.6862	14.7054	15.8139	19.9363
70	18.2545	15.2862	16.1162	14.0164	20.5515	14.819	14.5171	16.6457	19.3626
71	17.9989	14.5892	14.5452	14.6545	14.6833	14.4244	17.1377	21.1248
72	17.8113	13.4228	13.7906	14.5987	16.0316	14.4208	17.1399
73	17.5977	13.664	13.8443	16.2637	16.6881	15.1831	17.6863
74	17.6477	14.7207	13.742	14.4811	16.2234	21.5841	14.7395	16.1001
75	17.5434	14.2811	15.0993	14.7679	16.8785	21.5864	14.6078
76	17.107	17.6775	17.3111	16.6819	15.649	13.4974	14.2915	15.3076
77	17.5411	10.8018	12.7068
78	19.3239	13.0712	12.8222
79	23.215
80	13.4027	19.3104	13.2733
81
82	35.8566
83
84
85
86	16.8913	16.5773	15.9868
87	23.6859
88
89	19.609	17.7954	19.5037	18.6949
90	23.44	34.9283
91	13.8826	15.2559	15.9129	11.1909	14.339	16.9946
92	23.8678	25.6137	27.0846	36.7685	37.2305
93
94
95
96
97
98
99
100
101	14.8524	14.2372	17.3595	15.176	14.1281
102	18.2171	14.0627	15.3422	16.7564	15.6523	23.3181	14.4529
103	18.1903	13.6276	14.9584	15.6929	13.7329	15.3151
104	19.6227	16.9569	15.6201	17.3562	16.4232	14.8787
105	19.6442	14.6381	16.0469	15.0413	14.9893	18.7069	15.0192	16.3146
106	19.5569	16.9491	16.8542	17.4709	13.8185	15.3754	15.7867
107	19.5021	14.6299	16.8535	16.9386	13.9554	15.5161
108	18.178	15.9319	16.5478	13.7876	15.3686
109	18.1635	13.8603	15.5326	16.545	13.7885	15.2507
110	18.1578	13.8772	15.1591	14.3394	12.8698	15.0651
111	18.1624	14.5867	14.384	14.6166	13.1203	14.7795	17.4282
112	18.3175	13.5795	14.8366	15.1155	15.103	18.1404	15.1251
113	18.2687	13.5863	14.8356	14.8477	14.5593	17.4813	15.1285
114	18.1767	15.4289	15.0543	15.0706	14.2982	17.3562	15.1289
115	18.1047	15.4239	15.0223	15.0717	14.8981	19.2236	16.8772
116	18.1138	15.8758	15.0719	14.6937	19.6836	16.8815
117	17.9816	16.8918	15.0442	14.8534	19.7927
118	17.9412	17.5109	13.7747	19.3147	15.2469	19.4105
119	17.7123	15.5644	15.4228	13.5983	14.0827	15.2195	17.7459
120	17.7615	15.0863	16.4006	14.3722	19.0158	14.1832	18.2666	14.5614
121	18.0801	13.6869	14.8097	13.7979	14.1291	14.1754	15.3746	17.9541
122	16.6246	13.4491	18.3339	14.9892	16.6413	16.0635
123	16.5343
124	14.8	14.4212	14.6445
125	35.4797	12.9474	28.2223	23.365
126	18.879	12.3617	12.8636	15.4839	13.0951	14.2244	14.1005
127	13.9469	18.2545	14.0508
128	19.1702	14.6172	15.2411	13.4123	11.1399	16.2815	14.0544	15.1506	14.2133
129	19.158	14.3643	16.188	12.429	16.2835	13.9862	15.2791	11.5344	12.7305
130	19.3727	16.9894	14.4588	10.9625	18.0074	13.9808	14.8869	10.7858
131	11.2581	13.2487	13.8248	12.8056	15.6647	12.2087
132	19.66	14.7322	17.2412	13.8042	11.9307	13.0176	14.2026
133	19.4266	14.7338	17.2394	13.6327	11.9313	13.02	14.2001
134	14.2893	14.1695	14.5049	12.1749	12.2705
135	14.8195	15.3579	14.1062	13.8914	15.3299	14.5389
136	15.357	14.3891	15.1766	11.8871	13.3689
137	15.9571	18.2951	15.7425	19.4646	18.905	24.0551
138	14.3211	13.6987	10.2585	14.2521	13.5013	13.1959
139	21.1154	20.6718	18.5923	22.4406	24.6325
140	15.6563	14.2887	15.1117	14.0382	13.2547
141	13.8344	14.9992	15.0788	15.0688	13.2536
142	14.3239	14.4924	14.8702	16.3292	13.4286
143	22.8071	25.2474
144	13.3095	14.884	13.4617	14.5718	13.9802
145	13.3107	14.8806	13.4636	14.5575	13.9734
146	14.7607	14.4253	14.9135	13.5454	15.7955	23.7881	14.8887	13.9993
147	14.2265	14.8904	10.7336	13.4533	16.2243	23.4492	16.734	13.9696
148	13.8892	10.2083	14.8696	13.0878	16.2272	22.9922	15.6579	13.9684
149	13.9051	12.2382	14.8497	14.5947	25.4702	17.3023	13.9353
150	13.6272	15.0383	13.2226	15.899	24.92	18.3179	13.8038
151	23.1535	24.1338	14.7743	13.5442	15.7761	13.9434	14.8766
152	13.6396	13.4727	21.3607	18.1333	14.4569	14.7497	12.4142	15.3786	13.9356
153	19.3017	20.2077	18.1243	20.2628	16.7062	14.627	11.9898	14.443	13.8255
154	19.2976	20.0834	10.7051	17.0217	13.9537	13.4164	13.6668
155	16.3203	15.928	16.6574	15.7618
156	14.1882	13.5146
157	14.2138	13.5388
158	18.0853	16.9101	15.7646
159	17.3627
160	27.5365	24.9075
161
162
163
164	19.1319	17.8297	13.6994	21.7263	13.1166
165	16.9307	11.8845	15.1905	16.0364	13.3825	14.372	14.7777	23.0599	14.4561
166	16.8708	16.188	17.6834	13.9415	14.1002	14.5729	14.9915	14.9113
167	17.1956	14.5624	17.9737	16.934	14.0975	15.2329	16.4498	15.9838
168	14.167	18.1753	15.9267	14.3105	15.4993	15.9295	16.0185
169	14.4633	17.996	15.7008	13.5823	15.8281	16.2336	26.5852	16.0612
170	17.0214	17.8828	14.7943	15.7448	15.6752	21.4403	15.168
171	14.4586	18.1157	15.5249	15.6656	21.8271	17.6297	24.8187	16.2701
172	13.7743	18.3207	15.5239	15.7956	20.2316	16.7774	24.4531	15.3314
173	17.1375	14.6473	18.054	15.5255	16.4253	20.228	17.3172	22.6702	15.4272
174	17.3918	18.0542	15.7399	15.5789	19.2311	16.6715	25.0503	15.4137
175	17.5084	17.9721	14.7164	15.5823	20.2304	15.9704	27.9234	15.3154
176	16.9329	17.8518	14.7168	15.2421	20.1895	15.9557	15.4772
177	17.365	17.9869	14.3136	16.1435	16.1512	20.1895	15.2433
178	17.0121	17.5875	14.7975	14.6752	20.3198	14.8454
179	16.7094	17.4181	13.7158	14.3655	13.7349	19.749	14.7963
180	17.5013	19.8626	15.0791	18.2311	14.216
181	17.2345	19.7058	16.0723	19.0015	14.1303
182	17.505	15.6269	19.0003	14.945
183	18.9281	22.6624	14.9922	15.0755	20.0026
184	19.0846	20.822	14.5043	17.1668	15.0142	21.6751
185	18.7426	14.5683	15.377	15.5363	18.0241	15.8607
186	18.2725	14.4978	15.1406	13.674	14.9493
187	19.2262	14.6066
188	14.7482
189	20.3738	14.7265	15.094	16.6799	13.9746
190	14.7392	17.4254	14.806	15.5833
191	23.2701	14.7981
192	12.6195	13.8413	12.2868
193	17.9079	13.9229	11.5312	13.6771	13.3399
194	13.0674	13.9489	12.6639	14.8913	12.5416
195	14.7287	14.1587	12.606	13.3971	13.4729
196	15.0119	15.1648	13.4671	16.083	14.5163	11.9548
197	22.7802	19.6777	26.6264
198	16.8143	15.3146
199
200
201	24.8864	23.7168	24.6489
202	33.7356
203	17.8879	19.3826	20.5706	24.864	19.7561
204	25.7751	27.7191
205	14.1341	16.3181	17.8794	17.7197	14.2855	14.6544	12.426	12.9572
206	14.1933	16.2738	16.8278	17.1894	14.6158	14.6185	13.2073
207	16.3737	14.6397	14.3632	15.4834	14.4966	12.1387
208	16.3699	14.5734	15.9677	15.7375	18.7625	14.4871	14.2716	12.1573
209	17.4867	14.6537	17.1861	18.1303	14.5322	16.834
210	14.0624	12.9982	15.1508	26.5887	15.7417	13.6386
211	33.57	38.0434
212	22.1278	15.3072	17.7675	15.914	15.2364	18.4629
213	36.6117
214	16.3229	15.3536
215	14.3519
216
217
218	21.6967
219
220	12.088	14.3639
221	21.3696	18.8785
222
223
224
225
226	30.6368
227
228	14.8606	17.3229	14.4841	15.6318	15.8629	13.431	13.5797
229	13.0739	17.3435	12.313	13.522	15.2161	12.8465	13.808
230	13.2703	17.8761	12.802	14.7982	15.0022	15.0332	14.6798
231	13.5865	17.9497	14.1778	14.0502	15.1628	20.8303	13.5347	14.8783
232	17.045	17.7481	13.2769	14.0062	15.247	18.3646	13.6183	14.9957	18.7057
233	16.9637	16.071	17.892	12.8855	14.1879	12.3806	16.8347	15.0771
234	16.7701	16.693	17.5524	12.9144	15.045	14.5511	17.5122	15.9115	14.4648
235	15.833	17.6154	12.6547	14.4208	15.1576	17.4106	15.841	19.7039
236	15.5712	17.6233	13.1685	14.3405	15.7009	17.513	15.7809	19.3201
237	17.537	17.3856	14.0457	15.3711	16.138	17.1396	15.7025	15.1248
238	17.3697	13.88	15.0071	17.5338	15.3088
239	17.2356	13.975	14.2936	19.1077	17.5323	15.273
240	17.7602	14.2862	14.7514	16.665	13.7945	14.6755
241	17.6394	13.2873	14.5443	15.4099	12.9948	14.5234
242	17.5223	13.4025	14.8025	13.0613	15.4107	14.7055
243	17.5224	12.8808	14.3127	18.0046	15.3557	13.7553	18.9138
244	17.6009	13.6818	14.8558	18.7371	16.6701	14.7036	17.3103
245	21.3067	17.8549	14.1662	13.0643	14.1613	14.9543	14.6839	14.4431	18.0731
246	13.6221	18.0422	13.9152	16.4097	21.346	15.7282
247	15.2509
248	12.9368	13.1242
249	27.756
250	12.208	14.9253	12.1305
251	13.7047	17.9835	12.5152
252	13.6321	15.0393	17.7089	13.1654
253	14.4642	15.368	14.8125	13.1466
254	14.4642	15.368	14.8125	13.1466
255	14.7142	15.0692	13.578	16.4125	13.6087	18.7487
256	15.1925	14.1847	14.5632	13.2583	15.5966	14.0288
257	22.8543	21.6457	32.4288
258	19.7288	18.5705	21.6515	21.6615
259	30.9032
260
261	32.0446
262
263	35.8446
264	17.0307	22.9226
265	18.8599	26.6707	23.3444
266	15.0839	16.2374	16.4093	19.3998	14.635	12.7814
267	14.7798	16.2458	11.7007	18.6286	14.593	11.6972	12.8816
268	19.0565	19.9967	30.3588	30.0903
269	37.0542
270	12.3409	12.2305	15.7025	15.9538	14.4691	12.8089	16.7046	14.0013	14.2055
271	22.2825	17.4312	13.39	15.5061	15.1095	16.5253	15.0449	15.9534	15.2436
272	20.5865	22.6428	15.3091	14.3146	13.6672	15.2676	14.9424
273	21.1388	14.4028	14.4268	23.7041	15.2424	14.442	16.1829	12.9129	14.1733	14.1608
274	20.9307	15.1101	14.1373	21.7744	14.1498	26.5958	13.2648	14.0351
275	16.4467	17.1342	18.0454	16.4549	17.7764
276	15.5104	15.3532
277
278
279	18.2834
280
281
282
283
284	15.7308	13.6846	15.0284	14.1679	15.0326	18.907
285	17.1498	14.5477	14.0703	13.3358	16.6986	17.9233	17.3497
286	12.9001	17.5341	17.3594	13.8244	16.9667	14.7206
287	16.5767	17.7647	14.4931	13.3166	16.7781	16.3839	17.324	15.017
288	16.7937	13.9393	18.1246	13.0658	16.728	15.131	17.5064	14.9634	16.0987
289	16.613	17.7908	12.2046	15.1132	14.7418	16.2272	13.9641	15.2296
290	16.6164	13.8787	17.5824	13.5811	13.2795	15.743	14.8439	15.054	14.4969	16.6432
291	16.2245	13.2805	17.6817	14.2464	15.0055	15.9191	14.3034
292	16.6591	24.7947	17.3933	14.3474	14.4885	15.4802	14.7158
293	16.7968	15.9713	17.8085	14.8911	13.5684	14.347	14.7005	15.2383	20.9845	12.6099
294	15.6968	14.5218	17.8986	13.9188	12.6955	15.8353	15.5014	20.9195	13.6823
295	17.7692	13.9229	12.6827	17.5715	16.0999	20.1766	13.483
296	17.9233	13.9519	12.7039	17.2866	19.7098	20.4283	13.7547
297	17.9207	14.0173	12.7509	21.0003	13.7093
298	17.7532	14.086	12.6931	14.8134	21.0648	18.6112	21.3015	13.6877	14.6193
299	18.2439	14.4037	12.8924	19.473	17.8912	22.8227	21.4331	14.1934	13.8752
300	18.0216	14.7291	13.1329	17.6568	13.8126	21.947	13.9264	17.1423
301	18.0506	14.7291	13.1798	17.6569	13.25	21.4443	13.7553	17.1425
302	18.0505	14.7291	13.4705	18.1923	21.3808	14.5017	17.1367
303	18.0513	14.1896	13.3623	17.4747	21.3814	15.5767	17.1371
304	18.2186	14.1902	13.5032	17.1678	20.5691	15.5809	17.1405
305	18.2162	14.9888	13.3647	16.7029	19.6617	21.2937	15.3098	25.2505	18.6151
306	18.8269	13.4495	13.1892	15.9636	15.3136
307	13.3852	19.4468
308	12.6236	13.0772	10.0548
309	17.072	19.3774
310	14.4366	14.8056	13.3014
311
312	15.9895	19.3312	19.5261
313
314	21.6589	20.7319	23.2311
315	21.6664	20.7322	24.4117
316	13.47
317
318
319
320	27.1578	31.7592	26.011	26.6646
321	18.0718	16.2821	22.43	16.8126
322	16.0814	18.0843	16.4999	14.661	16.9555	15.6898	14.4673	14.1704
323	14.8704	14.6895	16.4116	16.4622	14.4502	12.4254
324	21.8151	14.6769	16.3581	15.7543	14.4802	11.5998	12.247
325	24.5796	30.1191	14.6709	16.4507	15.1239	14.9503	14.5777	13.0299	11.6619
326	19.2993	14.7163	10.3276	14.6719	16.4026	15.2169	14.4261	12.1018	11.8525
327	18.1262	14.4661	14.6817	14.1425	16.4205	15.762	14.6785	14.5692	13.0746	11.7189
328	16.7067	13.4999	14.1841	16.2448	15.6345	15.4794	18.7568	13.1115	14.7088
329	15.8282	13.8746	16.2565	14.2251	15.4441	15.0279	13.0048	15.9541	14.0648	14.805
330	18.1306	14.1797	16.0001	12.8068	15.5867	13.1914	15.5724	19.2993	10.6962	14.7822
331	15.9435	14.1606	12.3824	17.1106	14.938	10.1964	26.6519	13.5654	14.6594
332	15.8741	14.6532	13.0401	15.5396	12.6842	15.3152	22.8451	10.8573	14.586
333	14.9728	16.6718	14.9063	15.0763
334	14.6426	16.8375	14.5141	14.0208	13.6316	23.6681	12.3609	14.3988
335	23.6382	15.3654	17.8838	21.0825	21.2093	17.9982	17.3018	24.2166
336	19.3015	19.2856	23.1706	22.7387	21.8357	16.1264	20.0986	24.4013
337	14.6815	22.0104	18.9148	16.9239	24.3898
338	11.5428
339	26.8653	29.1597	35.0729	29.4143
340	19.6837	17.7127
341
342
343	18.8522	12.7168	14.5916
344	17.9592	14.7643
345	19.5259	17.4922
346	25.634
347	20.9115
348	16.3248	20.3704
349	33.7622	30.9955	27.4189
350
351
352
353
354
355	16.6543	17.6962	15.1257	15.0849	19.5033	14.8916	17.2998	18.8388	13.7944
356	16.5237	17.1223	19.3817	13.3073	19.7121	14.7377	16.5145	17.755	14.1695
357	16.7896	21.6014	21.4551	15.1775	21.8354	16.0074	13.2036	24.7993	15.3988	21.4345
358	17.0351	21.4515	19.2972	14.1477	15.7084	15.8789	12.381	17.8301	14.9443	16.9986
359	17.1504	19.3616	15.3768	17.3085	15.5734	12.8035	14.676	18.5127
360	15.5697	18.1105	15.2683	12.3644	14.6201	17.3016	15.4465	15.4949	18.9481	19.7053
361	18.0431	14.7842	12.4764	14.3844	17.137	15.9496	15.4265	17.9346	19.7083
362	18.1103	14.8524	12.544	14.9717	17.192	16.1282	15.316	16.6287	21.2936
363	16.6376	18.1532	14.8521	12.5684	17.6413	16.1747	18.1926	16.0652	15.3114	16.6317	19.703
364	16.6371	18.1885	14.0082	12.6039	19.3056	15.8927	19.8665	16.1869	15.4853	16.6362	19.7051
365	16.6315	27.5708	18.1169	14.0024	12.5629	15.8971	15.8541	15.4445	16.6351	18.8281
366	16.789	26.3124	18.0898	13.9283	12.7311	15.8949	23.5231	20.8295	15.5129	18.955	17.6782
367	16.7106	24.0106	18.237	13.9282	12.714	18.1362	22.4858	23.3867	16.7765	18.9527	17.1377
368	17.8498	13.8385	12.8285	16.0805	17.5126	18.2249	15.7143	17.1415
369	13.3476	17.7646	15.3829	12.8667	15.9902	17.1909	12.9006	16.8477	19.2828	18.616
370	14.1875	17.7262	15.6346	13.0407	16.6767	13.7888	16.998	27.0334	16.2949
371	16.8352	14.8859	17.7636	14.2115	16.4271	17.9541	19.8238	15.3821
372	16.561	15.1893	17.6913	13.7067	18.5919	18.7443	14.6314	16.5485
373	16.4478	17.0173	18.0868	28.581	18.1962	16.6143
374
375	17.5945	19.4223
376	15.4003	16.9428
377	15.8341	21.2552	31.0272	17.6553
378	17.807	11.5012	15.7973	18.349	14.0684	13.5657	14.7986
379	17.8727	18.6402	11.3167	16.9363	17.4658	16.2625	15.7473	15.1059	15.285
380	18.0015	12.5543	13.5272	13.5637	13.7418	14.8554	15.3023
381	18.2624	12.9741	13.797	13.3545	13.7813	14.5231
382	18.4037	10.7862	12.8706	12.1436	12.8795	12.161	13.597
383	20.1466	15.2844	20.5967	21.0054	17.1691
384	15.4084	25.7861	14.5728	16.2045	17.9984	14.0919	15.137	13.7033
385
386	14.8569	13.0033	16.2579	12.4287
387	13.4838
388	24.0828
389	20.2823	17.6514	13.1134	14.9979	16.6655	14.1401	15.4082	13.5979	10.714	14.5474	11.0571
390	20.7628	12.6854	15.3028	14.2505	14.9658	13.7551	12.6423	10.3347	13.8019
391	19.7133	10.9969	14.6933	14.1565	15.4262	13.8694	12.7204	11.279	13.6883	12.465
392	14.6804	20.1117	15.6966	14.1584	15.043	14.5948	14.6588	11.2795	10.3581	13.6218
393	20.9508	13.0044	11.4304	15.3076	14.1049	15.7505	15.0057	12.7974	13.9599	13.5948
394	21.3187	13.8493	14.1153	13.0847	14.3293	14.0909	15.9051	13.9129	14.4579
395	21.1978	12.5213	13.5677	14.1846	15.4414	12.9888	13.2754
396	21.1919	12.5237	13.5675	14.1642	15.4446	13.2248
397	21.2919	11.0696	13.2313	14.1878	15.2964	13.2443
398	21.2152	10.177	13.0407	14.1059	15.9819	13.2507
399	21.2687	13.1119	14.169	17.6461	13.3087
400	14.8993	15.5504	18.5127	18.8092	17.5438	14.9158	20.6552
401	38.6601	33.4987	36.1301	37.4787
402	18.2547	16.8199	14.7152	13.7246
403	24.2972	15.9936
404	17.8231	20.209	14.8009	13.6682	13.8588
405	27.0949	14.78	13.6884
406	15.321	13.4902	11.8979	14.7466	14.9373	13.5594
407
408	17.9838	13.0685	18.2846
409	16.6844	17.9587
410	25.8259	19.1103	16.9464
411	22.425	16.6394
412	22.5745	18.9608
413	33.9141	30.6139
414	17.1857
415
416	17.1717	17.8651	15.9657
417	13.936	17.5335	16.9921	13.7882
418	14.4148	18.0124	17.6857	17.911	15.2411	14.5771	19.5707	19.8321
419	15.8379	22.2422	14.0658	13.5941	12.8755	18.3516	15.2867	18.4939	16.7781	22.0456
420	17.2548	15.5165	21.254	14.0977	13.4387	15.0536	16.071	16.6266
421	15.5223	18.8722	15.5812	15.2796	13.31	13.1263	16.2291	15.0353
422	14.6293	17.2129	16.2699	16.9904	18.9489	19.3001	13.6976	21.9016	18.8933	16.0435	12.9549	14.7358
423	17.0229	17.599	15.8061	17.4391	16.308	16.326	19.1267	21.8143	17.7296	13.2708
424	16.7209	13.4999	17.347	15.8038	18.895	17.1575	17.6214	15.6317	19.6957	13.6286
425	17.2208	17.8403	19.7044	18.7068	21.975	20.0691	13.477
426	17.4208	17.55	21.8171	15.2251	23.6249	17.2239	13.6631
427	17.5913	16.2756	14.0479	13.5824	22.0465	13.7004
428	17.7206	13.3928	15.1199	22.3858	13.8949	16.1882	22.816	14.8089	13.5102
429	17.8798	17.5335	14.5093	14.4459	16.2087	19.8831	14.1275
430	17.7394	17.5305	13.95	14.5785	17.3207	16.3728	12.4493	22.9927	14.4964
431	13.2766	18.1605	15.9987	14.5748	15.3125	16.2278	23.2122	14.225
432	13.2381	18.1323	17.4821	15.0385	16.3709	21.5008	15.1271
433	16.7696	17.8217	13.8795	16.7526	14.2438	14.6599	21.8141	14.1873
434	17.6561	17.9823	15.4261	15.8736	18.0785	13.0924	14.6001
435	16.968	17.2179	18.2149	16.1269	12.9237	14.1753	18.4781	12.0754	14.3468
436	14.5634	19.1944	17.8223	19.9963	13.05	13.9101	18.3015	14.7767
437	14.5026	17.8224	17.7792	19.4392	18.1442	14.9308
438	14.0508	18.3337	17.0402	16.6817	14.8903	13.5535
439	15.8443	16.4361	15.761
440	17.695	13.0985	13.4858
441	19.1556	12.5071	13.9082	14.6094	12.9533	12.4154
442
443
444	31.6489
445
446	29.0969
447	15.3323
448	19.2504	15.2752	19.5599	23.1416	24.5361	22.7069	18.4511
449	18.1281	14.2719	12.4574	14.4224	15.1578	12.3831
450	29.1322
451	31.3563
452	15.5411	15.9554	14.2731	13.5425
453	17.7068	15.3485	19.7708
454	14.6867	14.7762	14.5033	13.681
455	24.4614	31.0646	39.9633	26.6358
456	24.6131	31.9652	39.9506	27.1815
457	15.2053	19.0891	15.179	14.0017
458	20.8467	15.6743	14.6727	15.3667	33.2409	14.081
459	15.8233	14.0071	15.9388	14.9485	14.637	18.2063	15.2135
460	15.823	13.7682	15.9379	15.2062	14.5021	18.2074	15.2122
461	21.7603	20.8319	11.7243	13.6569	14.983	11.9478	16.0291	13.0406	26.5667	14.1288
462	19.675	21.4612	13.6603	15.8935	15.062	15.0672	10.5807	13.939	26.5842	14.0761
463	20.9021	15.9517	12.6081	16.0123	15.054	15.1997	11.3684	12.5513	12.8806	26.5946	14.0793
464	20.8838	17.8323	13.9944	15.0403	15.3971	11.772	12.7394	18.4465	26.5944	14.1055
465	20.5717	17.826	14.2527	15.0206	15.0844	11.2718	12.7375	18.4423	25.0924	14.1014
466	20.5728	17.8252	14.4832	15.0314	15.2201	11.2711	12.512	18.441	23.4798	14.1057
467	20.5761	17.8298	14.1895	15.0645	15.784	11.6099	13.6573	20.3821	28.5051	14.0719
468	20.4851	23.2127	14.2631	16.9053	14.7837	15.0132	14.4648	18.1334	14.1014
469	25.2884	18.9157	26.8499	29.225
470
471
472
473
474
475
476	19.0589	16.8907	15.3161	14.0515	13.4993	17.267
477	20.5325	18.6304	15.0321
478	19.5134	19.2851	17.7306	13.4683	14.896	13.0347	13.2013	21.814	15.8713
479	20.7653	14.2871	12.6807	12.1399	15.9548	14.8592
480	20.4596	18.1299	13.6395	13.1021	24.5854	15.134
481
482	20.8409	15.7684	12.202	13.3376	14.7873
483
484
485
486
487
488	19.7157	23.5505	15.4076	16.4613	18.7329	18.1917	17.2456	17.8871
489	16.6601	17.2616	21.3182	13.7789	15.4484	13.321	16.6632	19.0077	12.8618	16.7621
490	14.009	29.5876	17.7944	14.9318	17.0041	14.8522	15.312	21.1143	17.9439	14.8043
491	14.5316	19.549	17.971	14.0045	14.5006	17.472	15.6425	23.6865	16.1862	14.9477
492	12.7268	14.9259	18.831	17.8749	21.8148	15.4346	17.2795	24.1308	18.2268	14.407
493	15.126	21.6636	17.6202	15.9893	16.3621	37.8253	20.49	20.07	15.0065
494	15.3354	17.4113	16.9323	16.3251	36.0204	19.7573	15.0386
495	17.4268	13.5457	15.646	16.7486	16.055	17.8956	37.7465	20.4472	21.8144	15.0217
496	17.4268	13.5457	15.646	16.7486	16.055	17.8956	37.7465	20.4472	21.8144	15.0217
497	17.8195	13.3328	15.1478	16.7007	16.322	17.9366	20.0549	12.6827	20.6682	20.5971	14.8686
498	17.6943	15.4859	14.514	17.5776	15.2333	17.8622	20.0592	21.0676	20.6403	14.8727
499	17.6422	14.691	15.5962	15.6823	17.3965	18.8296	20.3405	20.0296	14.8483
500	17.426	14.1971	15.5965	13.8408	16.6662	17.3973	22.8061	20.3443	21.0714	15.0998
501	17.8269	13.9199	15.6368	16.7056	16.915	18.3421	17.9511	20.2932	20.6188	14.552
502	19.3081	11.8271	11.6535
503	17.5626	13.6084
504	15.7938	17.6642
505
506	15.5743	17.5582	15.3673	13.5379	16.2595	12.2202
507	16.7605	17.7047	18.2917
508
509
510
511	29.1783
512	29.1783
513
514	16.7079	15.0454	14.821	15.8807
515	13.9984	13.9516	14.0506	15.0439	12.3073
516	18.0259	12.3139	14.7734	13.8617	13.0981	14.1301	14.8987	12.4954
517	20.2434	12.7902	14.2474	13.855	15.4232	14.0949	14.6293	14.7077	12.4959
518	20.383	13.0873	15.0729	13.9232	14.9378	11.3087	13.7218
519	18.654	19.6656	14.3113	13.9608	11.2739	13.8457
520	20.3568	19.0795	24.6591	23.0316	28.1257
521
522	15.3398	16.4312
523	22.085	29.1118	20.664	28.8233
524	19.7829	18.1828	15.8334	14.5673	13.9365
525	29.5331	17.4385	32.5691	27.4711
526	20.2073	16.9275	14.8332	13.1259	14.0097
527	20.633	13.6911	13.1236	14.8422	14.0266
528	19.5893	16.0032	12.0998	13.1713	14.6027	15.9461	14.0347
529	20.4884	18.137	11.4649	14.5676	14.6331	14.0589
530	15.9518	20.6292	12.6985	14.3877	14.6212	14.0742
531	20.6423	11.5193	14.6453	14.7004	14.0501
532	20.9037	11.9036	14.8166	13.3315	14.9365	14.0623
533	13.3888	20.9137	12.842	14.8248	13.6287	14.0616
534	15.9471	20.6092	14.8347	14.291	14.0206
535	14.4246	20.9813	15.0423	16.7071	14.4794	14.7756	14.0457
536	17.8277	16.712	20.6841	14.6817	14.7474	14.3369
537	20.9672	14.7579	13.85
538
539	38.1993
540
541	20.7062	13.1727
542	21.8267	12.7763
543	32.3309
544	25.645
545
546	19.2083	21.8145	13.4271	13.0434	14.609
547	19.3622	17.4576	14.9358	12.4113	12.2035	12.4327
548	23.0823	30.1752
549	12.9697
550
551
552
553
554	17.5177	14.563	16.9544	16.8972	19.8052	20.0815	17.1377	19.8472	14.0787	15.5371
555	14.4555	17.2683	16.2994	13.7956	19.0836	19.9845	16.1382	15.2775	16.5966	13.2549	18.5174	15.9421	14.2582	20.8344
556	13.3106	17.8766	16.4722	16.7216	25.6826	17.9518	15.2896	14.3294	16.4861
557	13.2981	17.9446	16.361	16.7233	25.8698	17.0955	15.7405	15.1767	15.9998
558	13.1877	17.9293	16.1204	16.6548	24.3203	19.1117	16.0755	13.9594	15.998
559	13.1179	17.6361	16.4432	16.8326	21.5651	19.0793	16.4822	15.2794	16.8057
560	13.9568	17.7357	17.0862	19.397	18.5286	16.7795	22.8163	15.3743	17.0243
561	13.3788	17.8276	17.0815	12.8281	20.2027	18.5273	19.5947	15.3107	17.029
562	17.7837	17.0818	13.8022	19.7129	18.4779	19.5997	15.9216	14.4505
563	17.8733	17.0801	16.1416	19.2567	21.3045	16.6944	14.3666
564	18.0104	17.194	17.0866	16.1377	19.2585	20.0694	13.0078	14.0533	16.695
565	17.7408	13.2066	15.6777	14.2587	16.1259	19.3955	20.0645	17.6561	14.4482
566	17.8908	13.3987	16.1266	20.0647	20.0633	19.6114	14.3261
567	18.4301	18.8238	16.9642	14.2301	14.3143	25.1025	18.2928	14.8134	15.9747
568	14.2053	22.8088	15.9289	14.8922
569	15.0251	13.9787
570	15.0176	15.915	17.132	15.3889
571	18.8165	16.5612
572	37.3312	34.297	26.5691	26.0615
573	25.3772	18.359	22.1886	14.2256
574	26.3736	20.3968	23.1899
575	25.6162
576
577
578	15.7875	21.946	23.5055
579	31.2384	32.4875	33.644
580	18.0985	23.2422
581	26.8575	28.6483
582	18.7039	13.6546	17.3176	17.5992	15.1404
583	16.3663	13.5908	18.3673	19.7384	15.7156
584	20.3945	14.2787	19.1478	16.7072	14.2914	13.9972	17.4746	13.5396	13.002
585	20.3945	14.2787	19.1478	16.7072	14.2914	13.9972	17.4746	13.5396	13.002
586	16.3753	18.8435	26.5892	14.8854	14.0597	13.5629
587	15.826	13.0205	18.9145	14.3904	15.0878
588	18.1278	14.1259	19.3052	14.406	16.5407	15.2038
589	19.5966	14.4428	15.3183	14.7568
590	15.6827	14.1743	17.9771	22.1999	17.8131
591	23.3275	24.843
592	17.8257	20.7071	11.8017	15.202	14.9412	14.0515
593	20.5483	11.7449	13.1377	15.2028	14.9693	14.78	14.0449
594	20.8394	15.0394	15.0433	16.7431	15.9719	15.3008	16.1278
595	20.7053	12.498	14.8644	15.8177	15.2626	23.2247	13.7024	14.0394
596	20.6493	12.5817	14.8389	16.0455	14.2876	24.2367	13.6377	14.0421
597	20.6331	13.0358	14.8019	14.9994	13.1909	20.3896	13.9795
598	19.9219	13.8312	14.8027	14.4517	13.3043	19.6627	14.7733	13.9967
599	20.6784	14.7077	14.8006	14.1441	25.2944	13.9342	14.4292

## Sheet: X_low
	0	1	2	3	4	5	6	7	8	9	10	11	12	13
0	280	-31	-98	-286	-36	-100	58	-291	-55
1	280	-35	-98	-286	-31	-90	59	-291	-56
2	282	-18	-102	-286	-30	-70	56	-291	-56
3	285	-29	-102	-286	-30	-112	56	-291	-55
4	285	-32	-102	-286	-30	-112	56	-291	-55
5	285	-32	-102	-286	-30	-112	56	-291	-53
6	285	-32	-102	-286	-30	-123	56	-291	-53
7	287	-32	-102	-286	-32	-112	56	-291	-54
8	276	-32	152	-102	-286	-37	-112	56	-291	-54
9	286	-32	152	-102	-286	-37	-112	59	-291	-54
10	286	-32	152	-101	-286	-35	-112	58	-291	-54
11	283	-32	-101	-287	-37	-123	59	-291	-53
12	283	-19	152	-101	-287	-35	-123	59	-291	-53
13	284	-33	153	-103	-294	-44	-125	54	-297	-53
14	284	-22	153	-103	-296	-44	-111	55	-297	-53
15	284	-22	153	-102	-295	-44	-104	58	-263	-53
16	284	-22	153	-102	-294	-69	-98	58	-263	-53
17	286	-17	154	-101	-291	-43	-107	59	-277	-53
18	282	-20	154	-98	-288	-68	59	-243	-55
19	292	-17	199	-97	-287	-59	-149	62	-267	-55
20	292	-20	199	-97	-282	-55	-164	62	-277	-56
21	289	-12	155	-93	-278	-50	-148	62	-257	-47
22	289	-10	155	-95	-279	-49	-125	59	-256	-44
23	284	-11	155	-97	-272	-52	-127	51	-242	-46
24	291	-11	139	-96	-295	-55	-154	57	-266	-48
25	286	-23	97	-97	-298	-57	-146	62	-255	-54
26	286	-15	98	-94	-292	-60	-154	57	-253	-51
27	273	-14	155	-91	-283	-60	-162	57	-246	-50
28	275	-13	156	-90	-294	-63	-170	57	-255	-53
29	278	-13	157	-85	-291	-58	-168	57	-252	-52
30	286	-13	157	-85	-291	-57	-155	57	-265	-51
31	264	-15	157	-87	-294	-60	-154	51	-252	-51
32	264	-23	156	-88	-298	-62	-148	51	-257	-53
33	284	-26	156	-93	-285	-57	-170	49	-285	-52
34	283	-23	157	-93	-279	-57	-182	49	-282	-51
35	252	-20	156	-89	-281	-60	-185	49	-284	-55
36	252	-20	156	-89	-281	-60	-185	49	-284	-55
37	281	-29	-96	-291	-60	56	-280	-50
38	279	-159	-44	-297	37	58	-329	-50
39	272	62	40	-4	33	-75
40
41
42	351	98	-56	-98	-4	-16	-205
43	345	15	115	-60	9	-7	-126
44	64	-71	-14	-248
45	397	-20	-83	-15
46	-46
47	32	-73	-46
48	186	29	73	-53	-19
49	61	-7	13	37
50	188	29	-65	-73	-178	-6
51	197	47	-45	-80	-162	-1
52	193	192	53	11	-285
53	135	191	53	-129	207	-271	12
54	155	55	53	203	-120	-30	-270	17
55	150	430	60	33	201	-126	98	-265	29
56	179	2
57
58
59
60	-81	-327	-117
61	4	-17	68	-14	-72
62	9	272	-24	12	5	-10	-69
63		215	203	-48	-132
64
65	331	-113	-7	-143	28	-98
66	336	-104	-32	-144	-10	-87	-76
67	329	-107	-107	-45	-126	-76	-103	-111
68	329	-112	-107	-51	-137	-34	-72	-103	-95
69	329	-106	-111	-72	-121	-88	-90	-177	-86
70	320	-96	-79	-72	-124	-109	-96	-152	-124
71	320	-103	-112	-58	-90	-98	-137	-61
72	313	-119	-127	-61	-63	-100	-139
73	307	-131	-121	-10	-49	-105	-94
74	306	-111	-129	-62	-57	70	-120	-170
75	301	-116	-101	-55	-45	57	-123
76	281	77	289	-92	-37	-145	-161	-71
77	340	-162	-105
78	350	-90	-107
79	19
80	125	10	-62
81
82	133
83
84
85
86	42	6
87	-210
88
89	97	52	-63	59
90	83	10
91	81	244	-97	-184	52	-237
92	-67	-14	-80	-268	-141
93
94
95
96
97
98
99
100
101	-102	183	-1	-70	-116
102	333	37	-87		-67	94	-91
103	334	11	-92	-17	-135	-68
104	333	78	-96	-7	-52	-81
105	334	53	-91	-48	-101		-77	-157
106	331	78	-70	-4	-131	-68	-209
107	329	53	-70	2	-125	-64
108	320	-83	-4	-137	-72
109	320	8	-88	-5	-110	-75
110	321	59	-96	-67	-138	-83
111	320	53	-105	-60	-129	-90	-104
112	326	53	-99	-49	-82	-233	-247
113	324	52	-100	-55	-98	-226	-248
114	322	70	-96	-51	-106	-228	-248
115	319	69	-95	-50	-87	-186	-147
116	319	-84	-50	-94	-177	-148
117	318	-72	-50	-88	-174
118	315	-67	-79	-141	-78	-183
119	305	-90	-98	-81	-126	-76	-236
120	317	-99	-77	-66	-146	-104	5	-98
121	320	62	-96	-99	-50	-83	-47	-69
122	271	54	336	-97	-16	-7
123	-7
124	94	-63	-56
125	-234	55	-96	-64
126	371	80	112	-24	-58	-19	-142
127	137	13	-41
128	381	160	-20	140	-196	-87	-48	13	-168
129	380	137	-21	-186	-85	-49	17	-307	-281
130	387	8	147	-270	-50	-40	14	-400
131	-42	156	-33	-232	-75	-58
132	391	6	7	155	-250	-47	-13
133	391	6	7	155	-250	-47	-13
134	168	8	-18	-225	-53
135	168	195	14	-37	-170	-22
136	197	150	35	-225	-35
137	133	59	-15	-90	48	-170
138	131	36	-92	188	-164	-2
139	152	84	35	-46	-166
140	141	195	54	-162	-6
141	151	221	65	-154	5
142	195	203	57	-108	5
143	157	-291
144	50	213	14	-305	25
145	50	213	14	-305	25
146	72	33	216	-140	-19	148	-283	31
147	63	213	-55	-142	-95	143	-263	28
148	58	-102	212	-147	-95	139	-288	27
149	61	-1	212	-133	165	-243	30
150	53	205	-162	-111	158	-226	24
151	434	113	197	-156	-115	-322	24
152	136	126	428	231	23	196	-180	-120	18
153	146	155	225	410	224	22	-188	195	14
154	142	405	-235	45	168	-168	4
155	200	23	-117	23
156	-11	-32
157	-10	-31
158	9		-32
159	-59
160	57	42
161
162
163
164	85	-94	-149	-7	-355
165	80	-172	-94	-114	51	-40	-83	15	-84
166	278	73	310	-112	-99	-46	-68	-63
167	287	63	317	-86	-109	-31	-58	-59
168	61	322	-95	-105	-26	-68	-58
169	62	316	-98	-116	-20	-62	-37	-57
170	279	312	-100	-21	-53	-97	-54
171	36	311	-86	-21	-111	-35	-59	-49
172	55	319	-88	-19	-130	-34	-63	-76
173	278	53	314	-88	-9	-130	-41	-80	-73
174	288	314	-86	-23	-131	-36	-56	-74
175	289	307	-99	-23	-130	-66	-26	-76
176	274	311	-99	-29	-131	-67	-72
177	292	316	-104	-13	-63	-130	-77
178	292	314	-97	-59	-129	-89
179	282	311	-149	-103	-81	-136	-90
180	319	-46	-31	-158	-109
181	315	-46	-31	-145	-110
182	315	-39	-144	-116
183	322	-25	-51	-82	-172
184	328	-37	-61	-170	-83	-143
185	322	183	-85	-39	-155	-58
186	337	126	-23	-87	-53
187	351	-58
188	-54
189	9	113	-57	11	-304
190	145		148	-16
191	32	-68
192	-62	142	-69
193	39	148	-86	-215	-47
194	-18	148	-66	-192	-61
195	178	23	-51	-188	-32
196	186	28	-40	-155	-23	-318
197	94	35	-16
198	53	-17
199
200
201	-400	-264	-400
202	41
203	-400	-400	-400	-400	-400
204	-18	-131
205	89	256	94	-71	52	60	-371	4
206	94	261	87	-96	62	-400	13
207	260	105	62	-89	66	-19
208	259	100	79	-95	48	62	-400	-26
209	260	114	-81	51	77	-400
210	89	33	-103	166	1	-400
211	-26	30
212	122	67	-74	-92	-45	-216
213	59
214	-126	-314
215	-43
216
217
218	25
219
220	-106	-77
221	-15	-38
222
223
224
225
226	84
227
228	67	323	-88	-122	-9	-89	-78
229	48	317	-130	-104	-21	-105	-74
230	53	326	-135	-101	-35	-87	-68
231	55	316	-118	-100	-34	-117	-101	-65
232	293	320	-130	-100	-31	-149	-99	-62	-55
233	290	71	326	-132	-50	-157	-168	-58
234	290	75	321	-127	-51	-96	-170	-60	-332
235	71	319	-130	-65	-83	-171	-62	-96
236	70	320	-121	-66	-71	-168	-63	-129
237	83	314	-122	-42	-63	-173	-64	-297
238	315	-125	-50	-167	-75
239	314	-124	-65	-1	-167	-76
240	317	-115	-54	-177	-192	-91
241	313	-120	-61	-206	-183	-99
242	312	-118	-55	-173	-205	-93
243	312	-126	-66	-15	-206	-125	-195
244	311	-124	-51	-4	-194	-122	-245
245	92	302	80	-123	-68	-234	-91	-100	-233
246	-4	315	-122	-20	36	-60
247	-199
248	-74	-226
249	38
250	44	-42	-89
251	134	14	-54
252	146	-7	-39	-34
253	179	5	-39	-74
254	179	5	-39	-74
255	175	28	-41	-136	-19	-252
256	196	92	24	-44	-147	-9
257	84	33	-92
258	78	38	-57	-210
259	-286
260
261	26
262
263	40
264	102	-34
265	50	-400	90
266	106	260	85	-67	66	5
267	98	251	-6	-59	63	-377	10
268	57	-87	-400	-262
269	92
270	57	49	239	73	-108	-132	17	-298	54
271	443	94	56	227	-108	66	-102	-254	52
272	402	137	216	-121	-124	-286	59
273	416	172	70	124	213	-127	62	-149	-304	37
274	411	205	-135	107	-126	174	-356	28
275	213	-103	-79	39	-245
276	18	-332
277
278
279	-13
280
281
282
283
284	76	106	-123	134	-83	20
285	337	69	200	-125	-95	-16	-7
286	54	333	-63	-79	-45	-90
287	284	330	-108	-70	-70	-8	-21	-83
288	283	31	334	-27	-72	-31	-19	-86	-177
289	286	332	-197	-82	-40	-43	-90	-177
290	284	61	323	-119	-223	-83	-34	-83	-99	-156
291	267	57	326	-104	-31	-46	-105
292	286	103	315	-102	-41	-74	-92
293	277	74	316	-101	-67	-102	-36	-79	52	-218
294	230	66	321	25	-130	-16	-74	50	-124
295	316	25	-131	-21	-192	39	-131
296	320	25	-131	-41	-124	43	-157
297	322	92	-128	64	-159
298	316	97	-129	-54	23	-151	69	-124	-367
299	322	155	-129	5	-161	63	71	-141	-400
300	324	130	-122	-165	-139	76	-117	-191
301	325	130	-121	-165	-167	70	-122	-191
302	325	130	-116	-157	70	-98	-192
303	325	155	-118	-168	70	-67	-192
304	331	155	-116	-173	60	-67	-191
305	331	195	-118		-135	69	-75	142	-148
306	348	-8	-119	-49	-251
307	-83	59
308	90	-70	-400
309	129	6
310	152	-63	-97
311
312	9	-98	-225
313
314	78	45	-49
315	78	45	-43
316	2
317
318
319
320	-400	-400	-400	-400
321	125	68	-22	-248
322	115	-50	261	50	92	79	-311	5
323	202	112	271	-75	68	-7
324	216	111	266	-78	69	-400	-12
325	218	8	113	269	-83	77	74	-381	-34
326	212	189	-126	110	265	-83	67	-368	-28
327	212	180	113	-96	269	87	-8	74	-382	-31
328	204	124	100	261	79	-91	52	-400	69
329	205	151	264	104	81	-93	42	11	-400	76
330	199	98	251	41	-77	-109	195	60	-394	72
331	245	94	29	-74	-6	-400	194	-316	67
332	243	97	37	-84	-127	-1	156	-394	64
333	88	-137	53	-174
334	99	247	-94	-95	-28	157	-340	66
335	122	-26	43	-233	-209	-308	13	-400
336	174	-137	111	-348	-323	-80	-304	-400
337	159	-400	-322	-7	-400
338	-400
339	-400	-400	-353	-400
340	81
341
342
343	72	-71	-52
344	-27	-54
345	-25	-51
346	39
347	-36
348	14	-89
349	143	57	39
350
351
352
353
354
355	273	314	71	-91	-72	-58	-41	16	-156
356	276	82	347	-119	-71	-40	-54		-114
357	287	97	356	-89	-50	-16	-157	77	-74	-55
358	290	96	338	102	-83	-17	-238	-16	-88	-197
359	291	336	213	-64	-22	-206	-95	-150
360	233	336	219	-150	135	7	-74	-71	-65	-95
361	334	195	-141	175	5	-63	-72	-91	-95
362	336	198	-135	204	6	-59	-76	-127	-40
363	279	338	198	-134	265	-9	-158	-60	-76	-127	-96
364	279	339	155	-132	286	-14	-121	-58	-70	-127	-96
365	279	111	336	155	-134	-13	-64	-71	-127	-118
366	281	109	331	146	-129	-14	70	-100	-69	-66	-148
367	278	103	336	146	-132	20	61	-72	-17	58	-197
368	326	146	-129	-11	-153	-2	-64	-195
369	59	323	223	-126	-11	-173	-137	-15	64	-150
370	66	308	220	-123		-112	-174	98	-48
371	266	64	303	-121	-72	19	-131	-71
372	265	74	310	-110	20	-1	-295	-54
373	266	86	330	65	334	-55
374
375	108	-12
376	106	-21
377	113	16	94	-19
378	344	-133	176	-6	-51	-58	-126
379	343	143	-160	188	-14	-16	-2	-6	-107
380	352	-108	103	-155	-66	-2	-130
381	352	-99	105	-154	-63	-11
382	357	-144	106	-188	-143	-68	-17
383	-37	100	-400	-152	-176
384	137	44	121	-397	-147	-130	-77	-351
385
386	169	-62	-100	-73
387	-200
388	-400
389	402	194	-2	-4	-64	164	-157	-27	-237	-4	-299
390	414	1	-77	167	-147	-95	-32	-227	-2
391	389	-43	-84	168	-155	-90	-30	-177	-4	-202
392	112	400	-81	167	-156	-92	16	-170	-400	-4
393	424	-46	-18	-88	165	16	-86	-27	3	-7
394	434	152	-43	-4	-100	165	-66	-23	-9
395	428	-53	-115	167	-58	-23	-17
396	428	-53	-115	166	-58	-18
397	430	-77	-105	167	-62	-18
398	430	-119	-110	166	-50	-17
399	432	-119	171	-30	-20
400	178	-25	-46	-40	37	-176	-240
401	-264	-170	-93	-201
402	229	61	193	6
403	98	-16
404	155	97	198	-336	21
405	114	184	3
406	135	117	1	186	-56	1
407
408	-23	-71	-238
409	-41	-38
410	116	-32	-64
411	-7	-65
412	-13	-58
413	72	58
414	-97
415
416	318	-9	-2
417	66	308	-4	-121
418	59	326	-59	-83	-46	-114	85	60
419	-82	297	-62	-133	-130	-59	-60	62	-20	123
420	301	-96	-111	-60	-107	-90	-36	-12
421	-97	-127	-30	-87	-109	-123	-35	-82
422	55	298	259	-71	-129	23	-101	111	9	-37	-332	-65
423	282	305	-87	-144	-20	-52	51	123	7	-156
424	280	-1	305	-86	-80	-146		-27	39	-141
425	285	-71	-80	16	112	29	-142
426	297	-73	-62	-35	131	-19	-134
427	303	-80	-61	-142	125	-139
428	308	44	-107	-55	-64	-52	76	-77	-146
429	314	74	-116	-51	-51	42	-91
430	309	74	-124	-48	-169	-48	-349	137	-79
431	38	326	-93	-48	-223	-51	139	-87
432	38	326	-73	-35	-45	108	-86
433	263	306	57	-84	-115	-82	125	-88
434	300	312	70	-92	17	-304	-78
435	284	294	-72	248	-120	-133	23	-356	-87
436	68	336	322	-58	-88	-102	18	-74
437	72	334	332	-59	17	-67
438	74	344	295	-82	-67	-315
439	87	-60	-79
440	351	79	-79
441	364	82	-76	-56	-105	-311
442
443
444	74
445
446	-59
447	-172
448	188	150	-79	-400	-374	-131	-186
449	190	158	-50	-114	-172	-59
450	44
451	-256
452	39	-66	177	-10
453	43	-42	-400
454	29	-83	186	-6
455		-10	-209	-11
456	38	26	-156	23
457	216	98	-125	26
458	429	78	216	-114	214	34
459	165	34	64	220	-176	-174	18
460	165	-15	64	220	-182	-174	18
461	-115	419	17	57	216	-102	-113	-156	172	32
462	387	188	58	85	220	-128	-142	-140	172	31
463	420	167	49	89	219	-118	-109	-162	-82	172	34
464	420	176	65	219	-116	-100	-158	19	173	35
465	412	176	68	219	-121	-113	-159	19	160	34
466	412	176	71	219	-119	-113	-165	19	144	35
467	410	175	68	219	-105	-95	-128	43	188	36
468	417	189	60	91	216	-132	-131	10	28
469	-360	-49	-400	-343
470
471
472
473
474
475
476	127	185	181	-26	-46	-42
477	127	190	-15
478	385	117	177	131	186	-36	-64	61	-90
479	426	151	-60	-81	-70	-102
480	419	180	-53	-72	94	-115
481
482	401	136	51	-71	-168
483
484
485
486
487
488	-58	-54	196	-33	8	27	-67	-19
489	293	-81	-71	101	-35	-163	-4	67	-257	-12
490	98	-75	-65	201	-8	-65	-79	101	-119	-97
491	192	-126	-62	164	-71	11	-69	132	-159	-93
492	25	209	-133	-65	296	-35	6	147	-118	-83
493	201	-109	-70	-11	6	177	105	-69	-70
494	211	-73	2	5	170	81	-69
495	292	45	215	-79	-8	32	178	92	-43	-69
496	292	45	215	-79	-8	32	178	92	-43	-69
497	315	42	199	-75	-17	34	43	-234	96	-59	-69
498	308	60	165	-66	-37	32	42	101	-59	-70
499	306	175	-90	-30	24	25	91	-70	-72
500	298	148	-92	129	-15	23	73	90	-55	-67
501	311	132	-88	242	-10	39	-4	89	-60	-81
502	48	-289	-176
503	330	-87
504	102	-29
505
506	119	342	138	-60	-88	-287
507	134	143	8
508
509
510
511	1
512	1
513
514	188	162	-7	-104
515	-142	168	-36	27	-363
516	350	-10	-84	171	-120	-11	9	-182
517	418	12	-93	171	-70	-12	1	2	-186
518	422	16	-70	176	-62	-165	1
519	-192	83	-87	180	-140	2
520	-63	-109	-260	-253	-190
521
522	3	-36
523	60	-389	-86	-375
524	405	88	-158	213	16
525	40	232	47	44
526	406	81	210	-159	25
527	417	48	-168	210	23
528	397	71	22	-166	208	-29	22
529	421	88	7	-141	209	23
530	154	425	33	-141	208	24
531	425	12	208	-136	23
532	425	20	208	-157	-46	23
533	129	425	35	208	-153	23
534	155	416	208	-148	21
535	145	419	206	-34	-138	-124	22
536	154	156	417	-138	203	29
537	418	195	6
538
539	-375
540
541	-15	-107
542	-11	-121
543	-246
544	-124
545
546	393	166	-58	-68	-165
547	392	146	140	-74	-79	-197
548	171	167
549	-116
550
551
552
553
554	303	53	280	-75	-77	269	-13	-1	-257	-81
555	49	304	264	25	-58	-79	224	-56	-60	-156	2	-188	-114	-72
556	38	314	257	-85	-35	4	-92	-117	-183
557	37	316	252	-85	-34	-8	-82	-91	-196
558	30	316	242	-86	-42	19	-76	-130	-197
559	25	304	255	-74	-59	19	-50	-88	-151
560	15	308	-82	-77	12	-45	121	-85	-146
561	38	308	-82	-224	-70	12	78	-87	-146
562	307	-83	-201	-83	25	78	-174	-114
563	308	-83	-123	34	102	-154	-116
564	313	71	-83	-123	34	85	-212	-126	-155
565	308	30	221	-236	-93	24	85	-131	-112
566	307	35	-93	43	85	-93	-117
567	328	81	-7	-90	-88	158	20	-100	-171
568	128	85	-43	-204
569	99	-60
570	94	-46	-17	-56
571	106	-45
572	-146	310	-5	1
573	131	2	-6	-245
574	132	9	-1
575	-228
576
577
578	140	-322	-370
579	89	94	23
580	-157	-317
581	84	-16
582	124	170	-58	-42	-5
583	123	174	-48	-18	12
584	137	121	389	63	-82	183	-22	-2	-135
585	137	121	389	63	-82	183	-22	-2	-135
586	130	380	124	-87	184	-10
587	131	107	374	191
588	142	122	383	191	-285	29
589	392	192	151	-7
590	143	197	38	-400	-23
591	-85	-210
592	156	413	6	-143	206	19
593	409	14	47	-121	209	-289	29
594	415	-118	212	-16	-283	-293	62
595	421	37	210	-123	-32	136	-339	28
596	420	39	210	-120	-51	147	-341	29
597	419	40	210	-137	-89	100	21
598	401	52	209	-137	-81	89	-301	23
599	422	63	208	-141	156	21	-79

## Sheet: X_high
	0	1	2	3	4	5	6	7	8	9	10	11	12	13
0	919	749	692	919	757	480	636	463	681
1	919	778	692	919	745	469	636	463	682
2	919	665	717	919	745	447	639	461	683
3	919	737	717	919	745	494	639	461	683
4	919	757	717	919	745	494	639	461	683
5	919	756	716	919	744	495	639	463	680
6	919	757	717	919	744	508	639	461	681
7	919	757	717	919	751	494	639	461	682
8	919	757	919	717	919	762	494	639	461	682
9	919	757	919	717	919	762	494	636	461	681
10	919	757	919	707	919	758	494	637	461	681
11	919	757	707	919	762	508	636	461	680
12	919	669	919	707	919	757	508	636	461	680
13	919	757	919	707	919	777	509	641	461	679
14	919	686	919	707	919	778	490	639	461	679
15	919	686	919	706	919	778	482	636	429	679
16	919	685	919	706	919	850	474	636	429	678
17	919	664	919	706	919	778	486	636	446	679
18	919	681	919	691	919	842	636	413	681
19	919	664	919	684	919	819	544	634	436	683
20	919	684	919	684	897	806	567	634	446	683
21	919	636	919	678	919	801	545	634	428	677
22	919	629	919	697	919	804	513	638	429	679
23	919	632	919	710	898	812	516	648	415	679
24	919	626	919	684	919	813	547	640	428	678
25	919	688	919	681	919	817	533	635	417	683
26	919	647	919	671	919	831	548	640	417	682
27	919	647	919	671	919	836	566	640	417	683
28	919	630	919	646	919	835	567	640	417	683
29	919	637	919	629	919	813	566	639	418	680
30	919	639	919	630	919	820	548	640	429	682
31	919	646	919	638	919	830	546	646	416	682
32	919	692	919	639	919	830	533	647	419	682
33	919	703	919	656	846	808	566	647	445	678
34	919	693	919	664	825	810	588	647	445	679
35	919	662	919	637	827	818	590	648	445	682
36	919	662	919	637	827	818	590	648	445	682
37	919	726	685	919	826	640	445	680
38	919	919	767	919	620	636	495	679
39	919	919	919	582	574	737
40
41
42	919	919	700	829	654	684	569
43	919	468	919	730	641	678	544
44	919	740	695	562
45	919	664	794	701
46	762
47	636	814	764
48	919	721	919	908	770
49	665	919	750	690
50	919	780	919	573	568	755
51	919	732	919	600	527	753
52	919	919	739	735	305
53	919	919	757	488	919	300	745
54	552	746	618	919	449	674	294	738
55	700	919	766	718	919	541	554	327	737
56	919	737
57	787
58
59
60	862	919	341
61	919	627	562	820	816
62	751	840	603	712	579	799	796
63	632	919	919	817	838
64
65	919	821	665	917	580	749
66	919	762	720	440	571	730	432
67	919	767	777	755	405	709	522	440
68	919	827	789	780	421	618	710	523	436
69	919	752	805	846	394	732	728	559	434
70	919	669	632	862	397	805	744	546	443
71	919	713	819	792	729	739	535	427
72	919	827	919	795	662	738	535
73	919	919	909	659	636	747	513
74	919	795	919	803	655	520	774	549
75	919	849	767	784	630	532	782
76	919	711	919	636	733	919	919	702
77	919	827	703
78	919	760	759
79	579
80	919	519	741
81
82	545
83
84
85
86	705	734	773
87	334
88
89	702	803	655	749
90	919	518
91	792	919	472	670	724	288
92	861	670	672	444	339
93
94
95
96
97
98
99
100
101	756	919	653	692	814
102	919	919	671	646	679	506	745
103	919	919	692	683	885	704
104	919	702	730	665	654	733
105	919	919	697	782	795	557	726	554
106	919	703	597	661	919	709	585
107	919	919	597	645	907	703
108	919	640	657	919	706
109	919	919	663	657	807	711
110	919	897	686	831	906	718
111	919	919	745	808	873	731	518
112	919	919	709	773	715	396	602
113	919	919	710	792	741	391	602
114	919	778	692	773	751	393	600
115	919	778	694	773	720	365	540
116	919	643	773	730	360	540
117	919	592	770	719	359
118	919	568	872	425	705	364
119	919	654	743	892	865	707	403
120	919	678	617	807	432	756	584	726
121	919	919	643	727	777	716	674	503
122	919	919	919	629	587	627
123	551
124	919	753	743
125	919	919	601	722
126	919	919	919	615	733	698	545
127	919	527	725
128	919	858	630	919	853	540	745	682	553
129	919	919	632	816	540	749	679	714	594
130	919	576	919	919	502	753	691	919
131	834	919	643	492	507	725
132	919	706	575	919	666	765	715
133	919	701	573	919	660	757	710
134	919	708	653	550	774
135	919	919	807	844	559	796
136	915	919	688	653	806
137	879	724	919	515	669	256
138	829	740	919	919	509	725
139	707	713	846	526	353
140	763	919	686	502	725
141	865	885	684	503	721
142	919	919	702	447	724
143	585	597
144	804	919	743	308	723
145	804	919	743	308	723
146	731	700	919	535	565	524	307	724
147	755	919	919	541	463	528	296	726
148	772	919	919	557	463	533	312	726
149	771	817	919	536	514	289	727
150	798	919	600	499	518	276	742
151	874	484	919	575	497	342	730
152	919	919	918	783	700	919	579	478	727
153	636	619	769	919	828	679	588	919	717
154	631	919	665	599	919	528	720
155	848	686	507	696
156	731	753
157	729	752
158	669	729	766
159	765
160	644	775
161
162
163
164	617	518	883	455	919
165	656	844	627	547	919	690	671	428	696
166	919	734	919	687	694	738	669	683
167	919	834	919	577	773	707	649	681
168	870	919	629	758	697	672	682
169	844	919	641	829	683	659	317	680
170	919	919	715	686	642	380	676
171	919	919	673	696	376	611	340	678
172	919	919	673	691	405	606	344	713
173	919	919	919	669	662	405	618	364	704
174	919	919	657	696	405	607	339	704
175	919	919	728	699	405	674	307	712
176	919	919	720	709	406	670	699
177	919	919	752	671	660	406	708
178	919	919	704	782	404	714
179	919	919	845	731	844	415	712
180	919	493	704	453	734
181	919	497	700	434	731
182	919	727	433	750
183	919	431	769	706	356
184	919	469	800	485	709	339
185	919	919	670	734	461	678
186	919	919	715	741	684
187	919	715
188	708
189	515	919	771	682	634
190	919	641	919	741
191	460	704
192	741	919	763
193	565	919	919	571	763
194	766	919	738	448	755
195	919	731	853	557	787
196	919	738	886	531	793	919
197	660	919	456
198	712	887
199
200
201	749	890	767
202	447
203	919	768	674	440	736
204	430	327
205	820	919	625	441	756	741	372	795
206	821	919	658	483	746	400	791
207	919	801	759	507	756	842
208	919	805	691	499	541	757	400	842
209	919	815	490	558	769	402
210	889	912	528	506	627	455
211	536	392
212	599	919	534	629	793	335
213	514
214	514	372
215	712
216
217
218	862
219
220	883	783
221	628	748
222
223
224
225
226	507
227
228	786	919	604	551	629	674	678
229	919	919	721	655	653	708	675
230	919	919	885	705	710	706	684
231	919	919	757	699	713	376	748	685
232	919	919	834	694	703	425	732	674	492
233	919	732	919	883	755	919	465	672
234	919	700	919	860	754	725	474	672	507
235	743	919	906	796	697	478	677	435
236	756	919	838	800	672	475	678	443
237	671	919	843	739	650	486	679	496
238	919	859	756	474	691
239	919	841	794	541	473	690
240	919	839	784	503	919	725
241	919	839	798	556	919	731
242	919	819	777	919	556	721
243	919	880	809	569	559	763	372
244	919	919	779	552	545	769	418
245	560	919	919	919	864	655	748	757	402
246	919	919	919	710	517	696
247	795
248	688	547
249	548
250	919	613	745
251	919	536	748
252	919	665	498	765
253	919	703	689	788
254	919	703	689	788
255	919	737	856	478	781	269
256	914	919	771	899	510	759
257	744	919	263
258	711	782	517	418
259	460
260
261	518
262
263	408
264	810	415
265	827	576	584
266	766	919	666	422	741	807
267	784	919	919	418	745	390	804
268	819	919	496	384
269	539
270	919	919	919	668	518	591	565	335	743
271	919	675	913	919	529	683	541	318	740
272	919	538	919	516	550	327	714
273	919	919	764	503	919	511	655	578	329	737
274	919	919	518	528	529	510	369	738
275	919	618	536	774	386
276	753	428
277
278
279	707
280
281
282
283
284	739	919	629	919	689	570
285	919	790	919	778	519	564	598
286	919	919	574	810	619	706
287	919	919	711	919	601	653	588	705
288	919	919	919	919	606	707	585	713	555
289	919	919	840	631	719	619	705	552
290	919	860	919	787	751	650	716	703	725	546
291	919	911	919	741	710	628	733
292	919	489	919	733	733	682	716
293	919	745	919	695	919	746	734	701	546	919
294	919	832	919	919	919	682	687	546	777
295	919	919	919	580	526	556	789
296	919	919	919	618	398	553	845
297	919	919	914	532	845
298	919	919	919	784	509	445	529	777	528
299	919	919	919	540	466	486	528	830	564
300	919	919	866	473	880	521	766	461
301	919	919	860	473	919	527	776	461
302	919	919	826	457	528	738	461
303	919	919	838	478	528	694	461
304	919	919	822	488	539	694	461
305	919	919	837	655	422	529	703	524	449
306	919	919	864	689	483
307	674	557
308	889	672	644
309	765	623
310	873	664	741
311
312	772	496	326
313
314	691	744	559
315	691	744	511
316	888
317
318
319
320	798	513	906	841
321	763	879	442	442
322	783	496	919	871	698	751	443	839
323	919	801	919	488	758	822
324	647	803	919	510	758	410	830
325	588	287	805	919	531	737	757	400	863
326	716	919	919	805	919	528	762	398	853
327	757	919	803	568	919	705	642	756	399	859
328	814	919	825	919	706	515	546	400	747
329	858	919	919	819	712	529	831	602	410	742
330	742	813	919	842	505	596	862	533	435	737
331	919	814	873	487	626	580	529	380	741
332	919	784	820	503	615	614	556	428	742
333	798	545	756	619
334	773	919	529	554	664	555	380	743
335	538	919	694	511	519	919	766	420
336	682	628	536	558	559	869	737	422
337	891	602	902	759	419
338	415
339	919	742	481	725
340	860	666
341
342
343	919	777	730
344	622	718
345	657	751
346	745
347	742
348	608	851
349	703	612	785
350
351
352
353
354
355	919	919	794	692	474	767	618	578	828
356	919	691	919	829	470	720	645	600	738
357	919	554	854	685	427	668	919	461	692	432
358	919	558	919	919	661	680	919	578	714	467
359	919	919	919	587	695	919	730	455
360	919	919	919	919	919	632	691	693	507	439
361	919	919	919	919	638	671	695	517	439
362	919	919	919	919	637	663	699	533	426
363	919	919	919	919	854	670	460	666	700	533	438
364	919	919	919	918	814	681	400	662	694	533	438
365	919	451	919	919	919	681	676	696	533	442
366	919	469	919	919	911	682	479	395	696	505	449
367	919	506	919	919	913	612	491	361	627	589	462
368	919	919	886	674	452	577	686	462
369	919	919	919	883	678	490	853	625	584	450
370	870	919	919	889	660	799	498	447	676
371	919	909	919	878	630	623	422	712
372	919	867	919	919	629	590	799	698
373	919	752	919	399	919	692
374
375	875	709
376	919	694
377	809	524	400	680
378	919	789	806	523	675	701	534
379	919	653	919	770	546	595	637	668	530
380	919	790	919	621	735	674	536
381	919	770	919	641	747	688
382	919	907	919	658	576	731	689
383	545	919	500	502	757
384	872	412	919	524	529	762	720	919
385
386	919	751	546	794
387	543
388	533
389	919	759	839	683	516	919	511	753	919	712	705
390	919	804	529	919	462	591	757	881	710
391	919	919	549	919	478	588	749	791	710	618
392	803	919	549	919	490	598	676	792	699	712
393	919	701	900	563	919	620	583	744	702	712
394	919	919	695	842	603	919	556	739	716
395	919	733	642	919	543	737	723
396	919	733	642	919	543	725
397	919	853	608	919	546	724
398	919	919	617	919	529	724
399	919	614	919	493	723
400	919	877	586	580	663	919	351
401	688	919	770	731
402	773	624	919	726
403	498	758
404	695	548	919	337	724
405	440	919	733
406	803	919	903	919	573	735
407
408	631	763	500
409	786	766
410	763	699	837
411	601	859
412	642	919
413	629	809
414	747
415
416	919	546	637
417	885	919	633	784
418	919	919	562	517	746	796	596	590
419	586	736	743	776	888	496	652	606	619	545
420	919	648	365	743	846	696	634	637
421	644	421	674	680	865	863	626	709
422	804	919	919	538	420	564	827	560	563	636	756	683
423	919	919	587	471	652	605	572	552	570	801
424	919	919	919	584	451	482	608	680	538	765
425	919	549	457	584	563	549	792
426	919	560	410	700	545	601	773
427	919	570	765	784	552	772
428	919	919	679	381	775	615	500	671	785
429	919	668	723	744	615	538	706
430	919	668	771	737	443	610	919	543	692
431	919	919	630	736	552	614	542	701
432	919	919	563	713	610	570	705
433	919	919	904	540	763	680	557	711
434	919	919	787	582	573	678	696
435	919	919	494	919	791	642	565	757	700
436	836	919	919	450	825	710	567	682
437	829	919	919	465	568	672
438	880	919	919	551	680	587
439	809	684	704
440	919	919	679
441	868	878	663	644	695	564
442
443
444	552
445
446	461
447	456
448	737	919	663	615	436	505	773
449	743	919	780	554	449	775
450	648
451	487
452	658	515	919	714
453	644	766	432
454	697	557	919	717
455	803	514	919	715
456	809	516	919	705
457	919	588	481	734
458	919	680	919	467	464	711
459	795	827	726	919	735	479	719
460	805	919	734	919	758	480	727
461	288	919	919	789	919	715	453	560	502	722
462	919	618	790	689	919	484	827	528	502	725
463	919	791	865	686	919	480	758	582	657	502	725
464	919	716	772	919	474	728	573	511	503	724
465	919	716	759	919	484	766	573	511	513	724
466	919	716	748	919	479	766	583	511	525	724
467	919	715	761	919	461	740	538	482	492	725
468	919	581	746	651	919	483	510	516	716
469	595	763	543	357
470
471
472
473
474
475
476	622	777	858	722	739	521
477	593	692	689
478	919	605	730	919	889	711	741	476	531
479	919	879	719	736	516	530
480	919	718	714	733	460	536
481
482	919	775	919	721	550
483
484
485
486
487
488	541	405	907	735	649	654	687	654
489	919	550	408	919	662	856	636	587	919	619
490	919	241	507	919	620	754	690	567	472	704
491	919	400	503	919	770	622	675	540	506	692
492	919	919	424	508	744	677	629	528	468	679
493	919	338	519	628	633	394	566	429	669
494	919	526	601	634	402	590	669
495	919	919	919	551	632	599	396	582	410	675
496	919	919	919	551	632	599	396	582	410	675
497	919	919	919	553	656	598	534	919	579	423	677
498	919	762	919	523	701	599	534	574	422	677
499	919	919	599	681	610	554	584	429	678
500	919	919	599	919	644	610	498	584	418	670
501	919	919	598	885	636	590	591	584	423	689
502	537	585	799
503	919	686
504	801	671
505
506	742	919	775	693	504	571
507	717	691	582
508
509
510
511	600
512	600
513
514	792	919	745	585
515	616	919	729	674	649
516	919	885	580	919	646	719	694	608
517	919	778	603	919	565	720	702	700	608
518	919	762	536	919	552	773	698
519	288	547	563	919	723	697
520	719	919	613	761	409
521
522	824	771
523	612	488	755	509
524	919	598	480	919	714
525	612	919	517	706
526	919	639	919	550	722
527	919	777	550	919	721
528	919	666	869	544	919	553	713
529	919	602	919	491	919	713
530	770	919	827	498	919	712
531	919	919	919	487	713
532	919	903	919	541	582	719
533	919	919	830	919	528	719
534	778	919	919	500	719
535	874	919	919	516	494	496	725
536	693	743	919	484	919	707
537	919	919	725
538
539	779
540
541	586	865
542	549	897
543	585
544	689
545
546	919	588	704	721	548
547	919	698	811	709	720	552
548	919	647
549	703
550
551
552
553
554	919	815	919	542	424	773	615	518	607	682
555	889	919	919	919	506	445	876	729	626	919	568	538	724	425
556	919	919	919	593	335	601	687	735	524
557	919	919	919	593	333	626	666	699	537
558	919	919	919	596	352	572	651	755	537
559	919	919	919	548	395	573	600	695	492
560	919	919	576	439	587	591	552	692	488
561	919	919	577	919	421	587	593	698	488
562	919	577	771	455	566	593	511	734
563	919	578	576	550	570	494	741
564	919	683	578	576	550	587	919	758	494
565	919	919	919	626	620	568	587	476	733
566	919	919	622	535	588	445	744
567	919	624	636	700	695	525	566	723	513
568	919	512	654	546
569	762	681
570	813	669	637	692
571	672	678
572	782	880	654	681
573	784	711	498	265
574	786	710	498
575	580
576
577
578	919	831	754
579	713	660	458
580	807	419
581	552	493
582	616	919	515	524	703
583	743	919	517	504	683
584	585	816	919	621	562	919	495	704	576
585	585	816	919	621	562	919	495	704	576
586	719	919	452	543	919	706
587	753	919	919	919	700
588	663	919	919	919	315	698
589	919	919	806	714
590	816	919	688	552	704
591	502	360
592	698	919	919	469	919	722
593	919	919	819	470	919	301	723
594	919	512	919	560	310	329	693
595	919	859	919	485	572	522	341	720
596	919	851	919	477	599	514	342	719
597	919	817	919	479	636	548	720
598	919	769	919	497	631	556	301	719
599	919	727	919	507	506	721	565

## Sheet: Thickness
	0
0	170.244
1	170.219
2	170.219
3	170.195
4	170.195
5	170.195
6	170.195
7	170.195
8	170.195
9	170.195
10	170.195
11	170.195
12	170.195
13	170.195
14	170.195
15	170.219
16	170.244
17	170.322
18	170.651
19	170.376
20	170.403
21	170.486
22	169.932
23	169.932
24	168.939
25	168.932
26	168.932
27	169.926
28	168.926
29	169.514
30	168.926
31	168.926
32	168.926
33	169.514
34	169.514
35	169.376
36	169.376
37	169.926
38	170.195
39	170.201
40	10000
41	52.0116
42	165.63
43	166
44	162.821
45	164.982
46	168.662
47	177.729
48	178.463
49	192.068
50	165.176
51	163.223
52	165.122
53	165.874
54	165.776
55	165.842
56	165.323
57	208.002
58	201.213
59	10000
60	182.192
61	175.878
62	174.467
63	172
64	10000
65	171.012
66	170.8
67	170.824
68	169.987
69	170.836
70	169.99
71	170.047
72	169.998
73	170.154
74	170.068
75	170.96
76	171.96
77	167.607
78	166.76
79	10000
80	175.142
81	10000
82	10000
83	10000
84	10000
85	10000
86	186.474
87	10000
88	10000
89	194.901
90	10000
91	158.75
92	10000
93	10000
94	58.395
95	57.0154
96	57.0241
97	10000
98	10000
99	10000
100	10000
101	170.015
102	169.861
103	169.81
104	168.92
105	168.923
106	168.92
107	168.92
108	168.923
109	168.923
110	168.215
111	168.928
112	168.935
113	168.935
114	168.935
115	169.153
116	169.177
117	169.947
118	169.931
119	169.935
120	169.954
121	169.123
122	165.352
123	166.427
124	168.431
125	206.048
126	166.066
127	165.695
128	165.104
129	165.126
130	164.102
131	165.003
132	164.852
133	165.195
134	179.224
135	180.879
136	177.28
137	189.519
138	165.762
139	192.161
140	164.955
141	164.046
142	164.86
143	10000
144	165.176
145	165.174
146	164.429
147	165.159
148	165.182
149	165.216
150	165.238
151	165.375
152	165.349
153	166.385
154	166.515
155	168.148
156	166.544
157	166.636
158	168.597
159	10000
160	258.013
161	10000
162	10000
163	10000
164	171.075
165	170.836
166	171.096
167	170.989
168	170.781
169	170.756
170	170.781
171	169.919
172	169.923
173	169.923
174	169.923
175	169.923
176	169.923
177	169.923
178	169.928
179	169.928
180	169.935
181	169.944
182	169.944
183	169.928
184	169.923
185	169.935
186	168.983
187	168.283
188	168.573
189	168.874
190	172.948
191	10000
192	169.315
193	170.18
194	170.412
195	183.337
196	185.938
197	194.43
198	10000
199	10000
200	10000
201	373.067
202	10000
203	366.791
204	163.234
205	163.654
206	160.921
207	162.082
208	162.536
209	160.705
210	10000
211	10000
212	10000
213	10000
214	10000
215	10000
216	10000
217	10000
218	10000
219	10000
220	10000
221	10000
222	10000
223	10000
224	10000
225	10000
226	166.083
227	10000
228	169.208
229	169.161
230	169.805
231	168.919
232	169.377
233	170.358
234	170.377
235	170.405
236	170.406
237	170.405
238	171
239	171.004
240	169.928
241	169.928
242	169.928
243	169.928
244	169.928
245	169.923
246	170.723
247	10000
248	166.945
249	10000
250	190.801
251	183.459
252	176.789
253	186.593
254	186.593
255	181.801
256	175.465
257	194.188
258	191.803
259	10000
260	10000
261	10000
262	10000
263	10000
264	10000
265	10000
266	160.101
267	163.268
268	10000
269	10000
270	162.902
271	163.745
272	165.267
273	165.385
274	166.314
275	217.281
276	10000
277	10000
278	10000
279	10000
280	10000
281	10000
282	10000
283	10000
284	170.026
285	169.08
286	170.773
287	170.244
288	170
289	170
290	171
291	171
292	171
293	171.018
294	171.004
295	171.004
296	171.018
297	171.004
298	171.042
299	171.042
300	170.989
301	170.989
302	170.989
303	170.989
304	170.989
305	170.989
306	171.452
307	192.905
308	170.773
309	175.811
310	183.368
311	10000
312	191.444
313	10000
314	194.537
315	194.516
316	10000
317	10000
318	10000
319	10000
320	373.519
321	10000
322	165.087
323	162.134
324	162.974
325	163.153
326	163.802
327	163.56
328	164.279
329	163.721
330	165.507
331	165.149
332	165.248
333	10000
334	164.252
335	183.26
336	206.14
337	222.637
338	10000
339	366.903
340	10000
341	10000
342	169.333
343	10000
344	10000
345	10000
346	166.58
347	10000
348	244.424
349	246.57
350	10000
351	10000
352	10000
353	10000
354	10000
355	171.615
356	171.195
357	171.726
358	171
359	171
360	171
361	171
362	171
363	171
364	171
365	171
366	171
367	171
368	171
369	171
370	172
371	172.074
372	172
373	171.939
374	190.95
375	175.914
376	170.245
377	168.614
378	168.046
379	168.033
380	167.072
381	166.605
382	164.767
383	173.391
384	164.747
385	10000
386	196.1
387	10000
388	10000
389	165.324
390	164.963
391	165.326
392	165.296
393	165.349
394	165.431
395	165.506
396	165.506
397	165.514
398	164.403
399	164.177
400	164.996
401	362.544
402	164.432
403	10000
404	162.872
405	165.176
406	164.647
407	10000
408	10000
409	10000
410	10000
411	10000
412	10000
413	262.57
414	10000
415	10000
416	170.505
417	168.969
418	170.046
419	169
420	168.513
421	168.592
422	169
423	168.624
424	168.624
425	169.624
426	169.624
427	169.597
428	169.597
429	169.597
430	169.597
431	169.624
432	169.624
433	168.923
434	168.935
435	168.678
436	170.597
437	171.435
438	171.174
439	173.409
440	170.591
441	170.629
442	10000
443	10000
444	176.451
445	10000
446	10000
447	10000
448	193.021
449	200.035
450	10000
451	10000
452	164.192
453	10000
454	163.307
455	163.403
456	164
457	201.761
458	163.982
459	163
460	163
461	163
462	163
463	163
464	163
465	163
466	163
467	163
468	163.427
469	10000
470	10000
471	10000
472	10000
473	10000
474	10000
475	10000
476	166
477	166
478	165.779
479	165.141
480	165.943
481	10000
482	166.875
483	10000
484	10000
485	10000
486	98.8699
487	10000
488	168.984
489	169
490	168.569
491	168.126
492	168.084
493	167.969
494	167.948
495	167.948
496	167.948
497	167.923
498	167.923
499	167.923
500	167.923
501	168.763
502	168.512
503	168.524
504	169.771
505	176.191
506	166
507	167.302
508	10000
509	10000
510	10000
511	10000
512	10000
513	10000
514	175.231
515	162.354
516	164.908
517	165.023
518	164.777
519	161.404
520	10000
521	10000
522	10000
523	10000
524	163
525	161.854
526	163.058
527	163
528	163
529	162.981
530	162.97
531	162.951
532	162.951
533	162.97
534	163
535	163.22
536	164
537	164
538	10000
539	10000
540	10000
541	10000
542	10000
543	10000
544	165.927
545	169.654
546	164.763
547	165.382
548	10000
549	10000
550	10000
551	10000
552	10000
553	10000
554	170
555	170
556	169.597
557	169.597
558	169.569
559	169.542
560	169.542
561	169.028
562	169.046
563	168.969
564	168.969
565	168.948
566	168.92
567	168.92
568	168.923
569	166.451
570	169
571	170.223
572	167.662
573	207.934
574	210.383
575	10000
576	10000
577	10000
578	195.737
579	10000
580	10000
581	10000
582	163.203
583	163.237
584	163
585	163
586	163
587	163.028
588	162.942
589	163
590	160.576
591	10000
592	163.08
593	163.068
594	163
595	163
596	163
597	163
598	163
599	163
